# Supplementary material for: Small Molecule Arranged Thermal Proximity Coaggregation (smarTPCA)—A Novel Approach to Characterize Protein–Protein Interactions in Living Cells by Similar Isothermal Dose–Responses
Source: Int J Mol Sci. 2022 May 17;23(10):5605. doi: 10.3390/ijms23105605 (PMC9147192; doi:10.3390/ijms23105605)
Supplement: Supplementary file 1 [file ijms-23-05605-s001.zip › SupplTables_and_MainTables_TL2022-03-31.xlsx]

## Sheet: Table_S1_Tm_comparison
	Table S1. Comparison of melting temperatures for MAPK14 from different CETSA studies in living HL-60 cells treated with different inhibitors.
		Tm values ± Std. Error from present study	Tagg values (given as averages ± s.d.) from Jafari et al., Nat. Protoc. 2014
	Inhibitor	Western blot	Western blot	AlphaScreen
	AMG-548	60.6 ± 0.5 °C	60.6 ± 1.0 °C	59.2 ± 0.9 °C
	SB203580	52.9 ± 0.4 °C	54.8 ± 0.6 °C	53.7 ± 0.6 °C
	ERK 11e	45.6 ± 0.4 °C	no substantial response (same as DMSO)
	DMSO	45.8 ± 0.4 °C	48.0 ± 0.8 °C	46.7 ± 0.7 °C

## Sheet: Table_2_and_S2_EC50_ITDR-CETSA
Table S2. Comparison of pEC50 values from different ITDR-CETSA studies.
present study, Table 2 of main text												Jafari et al., Nat. Protoc. 2014					Seashore-Ludlow et al., Biochemistry 2018
51°C												50°C, MAPK14 only, living cells only					MAPK14 only
		Living cellsa			Cell extracta													Living cells	Cell extract
Inhibitor	Protein	pEC50	Std. Error		pEC50	Std. Error		0.489628		1.65522		Inhibitor	pEC50*	s.d.			Inhibitor	pEC50	pEC50	remark
AMG-548	MAPK14	8.92772	0.15062		7.9007	0.0537283	1.18109	-0.346136	12.5689	-1.46261		AMG-548	7.72125	0.167896	WB		AMG-548		7.79189	extracted from figure 2b at 51°C of Seashore-Ludlow et al., Biochemistry 2018
	MAPKAPK3	8.965	0.159767		8.06453	0.132727		0.417882		1.55891			7.45593	0.214408	AlphaScreen				8.10811	extrapolated to 50°C and extracted from figure 2b of Seashore-Ludlow et al., Biochemistry 2018
	MAPKAPK2	8.78382	0.171764		8.02908	0.169022						SB203580	6.38722	0.130939	WB			8.22642	7.80503	extrapolated to 51°C and extracted from figure 3b of Seashore-Ludlow et al., Biochemistry 2018
	MAPKAPK2p	8.80117	0.123403		7.77952	0.183958							6.58503	0.196055	AlphaScreen			8.57233	8.14465	extrapolated to 50°C and extracted from figure 3b of Seashore-Ludlow et al., Biochemistry 2018
	Global fit	8.85948	0.0727862		7.93593	0.0562448
SB203580	MAPK14	5.33558	0.130556		5.8463	0.0802245	4617.64	1619.36	1424.61	289.033		*reported EC50 values:					SB203580		6.15405	extracted from figure 2b at 51°C of Seashore-Ludlow et al., Biochemistry 2018
	MAPKAPK3	4.97987	0.294689		n.d.b			-1198.91		-240.283		AMG-548 binding to MAPK14: 19 ± 7 nM (WB) and 35 ± 16 nM (AlphaScreen)							6.40541	extrapolated to 50°C and extracted from figure 2b of Seashore-Ludlow et al., Biochemistry 2018
	MAPKAPK2	5.19828	0.214994		n.d.b			1409.14		264.658
	MAPKAPK2p	6.38547	0.219996		n.d.b							SB203580 binding to MAPK14: 0.41 ± 0.12 μM (WB) and 0.26 ± 0.11 μM (AlphaScreen)
	Global fit	5.48313	0.0844859
	Global fit w/o MAPKAPK2p	5.19923	0.0659235
an=4 bNot determined due to lack of change in signal intensity
															273.15
																	48	0.00311381
																	49.5	0.00309933
																	51	0.00308499
																	52.5	0.00307078
																	54	0.0030567
																	55.5	0.00304275
																	57	0.00302893
																	58.5	0.00301523
																	60	0.00300165
																	61.5	0.0029882

## Sheet: Table_S3_EC50-TPP-CCR
	TPP-CCR, Living cells
	Inhibitor	Protein	Representative protein ID	pEC50	Std. Error	Hill slope	Std. Error	pseudo R2	na
	AMG-548	MAPK14	Q16539	8.33417	0.0373221	0.567499	0.0270349	0.981074	5
		MAPKAPK3	Q16644	8.59887	0.0510645	0.679483	0.0531202	0.958098	5
		MAPKAPK2	P49137	8.60355	0.0523529	0.718646	0.0602722	0.953775	5
		MYLK	Q15746	8.22487	0.152014	0.438001	0.0686913	0.772268	5
		USP24	Q9UPU5	8.56725	0.128195	0.71263	0.144524	0.749815	5
		STX4	Q12846	6.88366	0.298154	0.265923	0.0602693	0.71382	2
		HN1L	Q9H910	6.41398	0.173506	0.394455	0.0635145	0.691005	5
		MARS	P56192	6.68401	0.219519	0.403835	0.0823216	0.636645	4
		NUDT1	P36639	5.63962	0.134708	0.765702	0.173014	0.621864	5
		MAPK8	P45983	7.90621	0.461822	0.242873	0.081115	0.578751	2
		TRAPPC4	Q9Y296	6.3947	0.210812	0.427538	0.0883152	0.574743	5
		MRPS34	P82930	7.22298	0.443433	0.257347	0.0859122	0.550568	2
		MTMR1	Q13613	6.97874	0.389427	0.383687	0.133512	0.545007	2
	SB203580	MAPKAPK2	P49137	6.15213	0.0619253	0.768403	0.0759494	0.942248	4
		MAPKAPK3	Q16644	6.04885	0.0616362	0.764373	0.0753719	0.941919	4
		MAPK14	Q16539	5.71214	0.0583239	0.813125	0.0826687	0.933809	4
		NAPG	Q99747	8.70572	0.436943	0.236823	0.0675617	0.727885	2
		WDR46	A0A0G2JJL1	7.48569	0.41893	0.23499	0.071852	0.606158	2
		MAPK8	P45983	6.49615	0.332755	0.440439	0.145544	0.584669	2
		MYLK	Q15746	6.0197	0.301376	0.499243	0.170878	0.580794	2
		C14orf166	Q9Y224	6.39288	0.285291	0.327577	0.0778303	0.522044	4
	aOf the five or four replicates analyzed for AMG-548 or SB203580 treated living HL-60 cells, respectively, "n" datasets were obtained exhibiting a full set of reporter ion intensities, which were then used for fitting of dose response curves.
	Table S3. Data of the ITDR-CETSA experiments for ERK 11e shown in Supplementary Figure S2.
	Inhibitor	Protein	Representative protein ID	pEC50	Std. Error	Hill slope	Std. Error	pseudo R2	na
	ERK 11e	UGGT1	Q9NYU2	5.27131	0.0435749	1.97191	0.453392	0.892207	4
		SCO1	O75880	5.54878	0.110201	1.2503	0.349088	0.850319	2
		GANAB	Q14697	5.2773	0.0597679	1.80809	0.482444	0.828889	4
		MAPK3	P27361	6.36659	0.182083	0.590379	0.134787	0.821199	2
		UNC119B	A6NIH7	5.976	0.160416	0.672872	0.15608	0.817961	2
		PDIA6	Q15084	5.45359	0.0871506	1.32898	0.317271	0.792402	4
		SMIM12	E5RH51	6.36615	0.229372	0.467564	0.112164	0.746873	2
		MIA3	Q5JRA6	5.47364	0.104878	0.981928	0.216804	0.72236	4
		FECH	P22830	6.20047	0.188592	0.378776	0.06543	0.708002	4
		OGDH	Q02218	6.38446	0.181136	0.427075	0.0758005	0.705336	4
		POR	P16435	5.89145	0.18286	0.726503	0.206546	0.646383	3
		PDCD4	Q53EL6	5.98287	0.196004	0.68954	0.199272	0.585668	4
		PFAS	O15067	5.9333	0.25579	0.303829	0.0620378	0.58093	4
		UBE2O	Q9C0C9	6.72888	0.257935	0.373136	0.0851345	0.570996	4
		LRRC59	Q96AG4	5.83183	0.198292	0.587926	0.154014	0.557484	4
		CANX	P27824	6.06329	0.192921	0.796794	0.254806	0.554051	4
		RARS	P54136	7.07607	0.269568	0.382473	0.091893	0.54409	4
		HN1L	Q9H910	6.96377	0.341249	0.202246	0.0489412	0.536293	4
		DDX18	Q9NVP1	6.70096	0.48785	0.200964	0.0686992	0.530788	2
		ENDOG	Q14249	8.55848	0.445594	0.403843	0.178451	0.525732	2
		CHMP4B	Q9H444	7.37505	0.358913	0.205024	0.052136	0.515734	4
		NOP2	P46087	6.98047	0.263939	0.290535	0.0601435	0.50966	4
		VAPA	Q9P0L0	5.80515	0.192268	0.663065	0.186015	0.50905	4
		ANP32E	H0YCE2	6.7753	0.358491	0.576082	0.248605	0.503525	2
	aOf the four replicates analyzed for ERK 11e treated living HL-60 cells, "n" datasets were obtained exhibiting a full set of reporter ion intensities, which were then used for fitting of dose response curves.

## Sheet: Table_S4_PPI-UniProt
Table S4. Protein-protein interactions listed in the UniProt database (release 2021_03) for MAPK14, MAPKAPK3, MAPKAPK2, MYLK, MAPK8, and MAPK3, ordered by the number of experimental evidences. Proteins identified in the present TPP-CCR experiments are underlined and proteins that exhibited acceptable stabilizing dose-response characteristics are underlined and written in bold letters.
Protein	MAPK14	MAPKAPK3	MAPKAPK2	MYLK	MAPK8	MAPK3
Synonym	p38alpha	MK3	MK2		JNK1	ERK1
Interactors	MAPKAPK2 (DR curves for AMG-548 and SB203580)	MAPK14 (DR curves for AMG-548 and SB203580)	MAPK14 (DR curves for AMG-548 and SB203580)	GOPC - isoform 2	MAPK8IP1	DHPS
	MAPKAPK3 (DR curves for AMG-548 and SB203580)	Core protein precursor (PRO_0000037566) from Hepatitis C virus genotype 1a (isolate H77).	HSF1	GOPC	PIK3R1	DAPK1
	ZNHIT1	HSPB1	HSPB1	APPBP2	RPTOR	MAPK14 (DR curves for AMG-548 and SB203580)
	RPS6KA4	MAPK11	Phc2	NCK1	JUN	PTPRJ
	PTPRR - isoform Alpha		Mapk14 from Mus musculus.		H2AX	PEA15
	Ptpn5 - isoform STEP61 from Mus musculus.				MAP2K7 - isoform 2	PNKD
	MAPK3 (DR curve for ERK 11e)				DUSP10	CD248
	SUPT20H				DUSP16	DUSP1
	NR4A1 - isoform 1				CBL	DUSP6
	MAPK1				Mapk8ip1 - isoform JIP-1b from Mus musculus.	FAM135B - isoform 4
	MAP2K3				JUN	KLHL32
	RB1					MRFAP1L1
	CSNK1D - isoform 2					OTUD7B - isoform 2
	DUSP1					PADI3
	EEF1A1					PKM - isoform M2
	MKNK1					UNG - isoform 1
	MKNK2					Ptprr from Mus musculus.
	PTPRR					ELK1
	DUSP9					MAP2K1
	PPM1A					itself
	TSC1					PTPRB
	ZFP36L1					SCRIB
	NUP153					Eps8 from Mus musculus.
						Klf4 from Mus musculus.
						Nsmf from Mus musculus.

## Sheet: Table_S5_pVal_inCell_CETSA-WB
											1	1	1	1	2	2	2	2	3	3	3	3	4	4	5	5	5	5	1			1	1	1	2	2	2	2	3	3	3	3	4	4	5	5	5	5	1
											1	2	3	4	1	2	3	4	1	2	3	4	3	4	1	2	3	4	1			2	3	4	1	2	3	4	1	2	3	4	3	4	1	2	3	4	1
										Protein2	MAPK14	MAPK14	MAPK14	MAPK14	MAPKAPK3	MAPKAPK3	MAPKAPK3	MAPKAPK3	MAPKAPK2	MAPKAPK2	MAPKAPK2	MAPKAPK2	MAPKAPK2p	MAPKAPK2p	GSK3a	GSK3a	GSK3a	GSK3a	MAPK14			MAPK14	MAPK14	MAPK14	MAPKAPK3	MAPKAPK3	MAPKAPK3	MAPKAPK3	MAPKAPK2	MAPKAPK2	MAPKAPK2	MAPKAPK2	MAPKAPK2p	MAPKAPK2p	GSK3a	GSK3a	GSK3a	GSK3a	MAPK14
										Inhibitor2	AMG548	SB203580	ERK11e	DMSO	AMG548	SB203580	ERK11e	DMSO	AMG548	SB203580	ERK11e	DMSO	ERK11e	DMSO	AMG548	SB203580	ERK11e	DMSO	AMG548			SB203580	ERK11e	DMSO	AMG548	SB203580	ERK11e	DMSO	AMG548	SB203580	ERK11e	DMSO	ERK11e	DMSO	AMG548	SB203580	ERK11e	DMSO	AMG548
								Protein	Protein		MAPK14	MAPK14	MAPK14	MAPK14	MAPKAPK3	MAPKAPK3	MAPKAPK3	MAPKAPK3	MAPKAPK2	MAPKAPK2	MAPKAPK2	MAPKAPK2	MAPKAPK2p	MAPKAPK2p	GSK3a	GSK3a	GSK3a	GSK3a
									in cell																					in cell
									Table S5. ANOVA p-values for comparing the null model (fit using one melting curve for the two conditions compared) to the alternative model (fit using two melting curves for the two conditions compared) for CETSA in living cells. Cells are colored green for p ≤ 0.001, blue for 0.001 < p ≤ 0.01, and yellow for 0.01 < p ≤ 0.05, i.e. different alpha levels for statistical significance of rejecting …																					Tm difference						60.5813	52.8586	45.562	45.8197	54.6788	51.5617	48.3234	48.0629	54.3875	50.9584	49.1856	49.2049	47.1794	48.2461
								Protein	Protein		MAPK14				MAPKAPK3				MAPKAPK2				MAPKAPK2p		GSK3a					Protein						MAPK14				MAPKAPK3				MAPKAPK2				MAPKAPK2p
	Protein2		Inhibitor2	p-val_ANOVA(model,model_0)						Inhibitor	AMG548	SB203580	ERK11e	DMSO	AMG548	SB203580	ERK11e	DMSO	AMG548	SB203580	ERK11e	DMSO	ERK11e	DMSO	AMG548	SB203580	ERK11e	DMSO			Inhibitor					AMG548	SB203580	ERK11e	DMSO	AMG548	SB203580	ERK11e	DMSO	AMG548	SB203580	ERK11e	DMSO	ERK11e	DMSO
1	MAPK14	1	AMG548	1		1	1	MAPK14	MAPK14	AMG548	1	1.63162e-30	9.56462e-46	4.12595e-46	6.07825e-23	1.27876e-26	2.08504e-34	4.97773e-34	2.91427e-24	3.30393e-28	7.97398e-28	2.98691e-22	4.69547e-17	3.4361e-17	1.85701e-37	1.85751e-24	4.93945e-25	1.47358e-24		MAPK14	AMG548	60.5813	0.517183	117.137	2.19016e-170	0	7.72273	15.0194	14.7616	5.9025	9.01959	12.258	12.5184	6.19381	9.62296	11.3958	11.3765	13.4019	12.3352
1	MAPK14	1	AMG548	1.63162e-30		1	2	MAPK14		SB203580	1.63162e-30	1	1.23538e-24	4.31683e-25	0.000291051	0.0336355	8.23464e-14	1.83829e-13	0.012136	0.00182522	2.17727e-06	0.000631966	1.05649e-08	1.7586e-08	0.120338	0.000767711	0.000706757	0.00608697			SB203580	52.8586	0.350009	151.021	7.8749e-190	-7.72273	0	7.29663	7.0389	-1.82023	1.29686	4.53522	4.79565	-1.52892	1.90023	3.67303	3.65372	5.67915	4.61247
1	MAPK14	1	AMG548	9.56462e-46		1	3	MAPK14		ERK11e	9.56462e-46	1.23538e-24	1	0.170013	1.16417e-25	5.68329e-17	1.06619e-06	5.98018e-06	8.44921e-24	2.18477e-15	1.65792e-06	0.00025728	0.0796385	0.000587351	2.22038e-32	4.01311e-28	4.67838e-29	6.03874e-26			ERK11e	45.562	0.427995	106.455	4.25828e-163	-15.0194	-7.29663	0	-0.257724	-9.11686	-5.99976	-2.7614	-2.50098	-8.82555	-5.3964	-3.6236	-3.6429	-1.61748	-2.68415
1	MAPK14	1	AMG548	4.12595e-46		1	4	MAPK14		DMSO	4.12595e-46	4.31683e-25	0.170013	1	2.18604e-26	2.4001e-17	5.75278e-07	1.53858e-05	1.67951e-24	1.01154e-15	1.68387e-06	0.000281873	0.0181948	0.000718782	2.97101e-33	1.49632e-28	1.86998e-29	1.98255e-26			DMSO	45.8197	0.359087	127.601	6.36512e-177	-14.7616	-7.0389	0.257724	0	-8.85913	-5.74204	-2.50368	-2.24325	-8.56782	-5.13867	-3.36587	-3.38518	-1.35976	-2.42643
1	MAPK14	1	AMG548	6.07825e-23		2	1	MAPKAPK3	MAPKAPK3	AMG548	6.07825e-23	0.000291051	1.16417e-25	2.18604e-26	1	2.93201e-05	7.74898e-15	3.67279e-15	0.168727	3.42943e-07	3.99428e-10	2.74587e-07	1.29724e-07	2.20108e-07	0.00811668	0.484746	0.419287	0.327283		MAPKAPK3	AMG548	54.6788	0.360372	151.729	2.63194e-156	-5.9025	1.82023	9.11686	8.85913	0	3.11709	6.35545	6.61588	0.291309	3.72046	5.49326	5.47395	7.49937	6.4327
1	MAPK14	1	AMG548	1.27876e-26		2	2	MAPKAPK3		SB203580	1.27876e-26	0.0336355	5.68329e-17	2.4001e-17	2.93201e-05	1	2.61333e-07	2.15404e-07	0.0002496	0.395429	0.00502307	0.0611909	5.44754e-05	0.00017357	0.00279859	2.1498e-05	4.90533e-06	0.000111619			SB203580	51.5617	0.481661	107.05	1.97427e-135	-9.01959	-1.29686	5.99976	5.74204	-3.11709	0	3.23836	3.49879	-2.82578	0.603368	2.37617	2.35686	4.38228	3.31561
1	MAPK14	1	AMG548	2.08504e-34		2	3	MAPKAPK3		ERK11e	2.08504e-34	8.23464e-14	1.06619e-06	5.75278e-07	7.74898e-15	2.61333e-07	1	0.573314	2.40188e-13	7.35432e-06	0.18696	0.418199	0.156758	0.906747	1.58476e-17	8.0374e-18	4.47043e-19	6.10131e-16			ERK11e	48.3234	0.460277	104.988	2.85393e-134	-12.258	-4.53522	2.7614	2.50368	-6.35545	-3.23836	0	0.260426	-6.06414	-2.63499	-0.862194	-0.881499	1.14392	0.0772501
1	MAPK14	1	AMG548	4.97773e-34		2	4	MAPKAPK3		DMSO	4.97773e-34	1.83829e-13	5.98018e-06	1.53858e-05	3.67279e-15	2.15404e-07	0.573314	1	8.35998e-14	4.48116e-06	0.156952	0.362044	0.135503	0.919109	8.12999e-18	5.89941e-17	5.88066e-18	1.98686e-15			DMSO	48.0629	0.402416	119.436	5.71136e-142	-12.5184	-4.79565	2.50098	2.24325	-6.61588	-3.49879	-0.260426	0	-6.32457	-2.89542	-1.12262	-1.14192	0.883496	-0.183176
1	MAPK14	1	AMG548	2.91427e-24		3	1	MAPKAPK2	MAPKAPK2	AMG548	2.91427e-24	0.012136	8.44921e-24	1.67951e-24	0.168727	0.0002496	2.40188e-13	8.35998e-14	1	5.70355e-06	2.17352e-09	5.21023e-07	1.49822e-06	2.54088e-06	0.0196003	0.283224	0.51945	0.51274		MAPKAPK2	AMG548	54.3875	0.285706	190.362	6.13454e-169	-6.19381	1.52892	8.82555	8.56782	-0.291309	2.82578	6.06414	6.32457	0	3.42915	5.20195	5.18264	7.20806	6.14139
1	MAPK14	1	AMG548	3.30393e-28		3	2	MAPKAPK2		SB203580	3.30393e-28	0.00182522	2.18477e-15	1.01154e-15	3.42943e-07	0.395429	7.35432e-06	4.48116e-06	5.70355e-06	1	0.0357421	0.179122	0.000356552	0.00191758	1.57703e-05	1.54109e-07	3.11878e-08	1.18653e-06			SB203580	50.9584	0.557889	91.3414	2.64625e-125	-9.62296	-1.90023	5.3964	5.13867	-3.72046	-0.603368	2.63499	2.89542	-3.42915	0	1.7728	1.75349	3.77891	2.71224
1	MAPK14	1	AMG548	7.97398e-28		3	3	MAPKAPK2		ERK11e	7.97398e-28	2.17727e-06	1.65792e-06	1.68387e-06	3.99428e-10	0.00502307	0.18696	0.156952	2.17352e-09	0.0357421	1	0.99341	0.142324	0.534864	6.3304e-10	5.82228e-09	1.89883e-09	1.95523e-08			ERK11e	49.1856	1.02764	47.8625	7.99997e-88	-11.3958	-3.67303	3.6236	3.36587	-5.49326	-2.37617	0.862194	1.12262	-5.20195	-1.7728	0	-0.0193049	2.00612	0.939444
1	MAPK14	1	AMG548	2.98691e-22		3	4	MAPKAPK2		DMSO	2.98691e-22	0.000631966	0.00025728	0.000281873	2.74587e-07	0.0611909	0.418199	0.362044	5.21023e-07	0.179122	0.99341	1	0.387215	0.75447	1.59525e-06	1.54338e-05	8.53758e-06	2.52612e-05			DMSO	49.2049	1.40279	35.0764	1.28218e-70	-11.3765	-3.65372	3.6429	3.38518	-5.47395	-2.35686	0.881499	1.14192	-5.18264	-1.75349	0.0193049	0	2.02542	0.958749
1	MAPK14	1	AMG548	4.69547e-17		4	3	MAPKAPK2p	MAPKAPK2p	ERK11e	4.69547e-17	1.05649e-08	0.0796385	0.0181948	1.29724e-07	5.44754e-05	0.156758	0.135503	1.49822e-06	0.000356552	0.142324	0.387215	1	0.131304	8.45168e-10	4.26772e-11	2.96229e-12	1.32687e-09		MAPKAPK2p	ERK11e	47.1794	0.900181	52.411	1.80974e-17	-13.4019	-5.67915	1.61748	1.35976	-7.49937	-4.38228	-1.14392	-0.883496	-7.20806	-3.77891	-2.00612	-2.02542	0	-1.06667
1	MAPK14	1	AMG548	3.4361e-17		4	4	MAPKAPK2p		DMSO	3.4361e-17	1.7586e-08	0.000587351	0.000718782	2.20108e-07	0.00017357	0.906747	0.919109	2.54088e-06	0.00191758	0.534864	0.75447	0.131304	1	2.35811e-09	2.32701e-11	1.05804e-12	1.22252e-09			DMSO	48.2461	0.494403	97.5846	3.07965e-21	-12.3352	-4.61247	2.68415	2.42643	-6.4327	-3.31561	-0.0772501	0.183176	-6.14139	-2.71224	-0.939444	-0.958749	1.06667	0
1	MAPK14	1	AMG548	1.85701e-37		5	1	GSK3a	GSK3a	AMG548	1.85701e-37	0.120338	2.22038e-32	2.97101e-33	0.00811668	0.00279859	1.58476e-17	8.12999e-18	0.0196003	1.57703e-05	6.3304e-10	1.59525e-06	8.45168e-10	2.35811e-09	1	0.131276	0.0954622	0.237891		GSK3a	AMG548	53.2597	0.245686	216.78	1.27888e-217	-7.32163	0.401106	7.69773	7.44001	-1.41912	1.69797	4.93633	5.19675	-1.12781	2.30134	4.07414	4.05483	6.08025	5.01358
1	MAPK14	1	AMG548	1.85751e-24		5	2	GSK3a		SB203580	1.85751e-24	0.000767711	4.01311e-28	1.49632e-28	0.484746	2.1498e-05	8.0374e-18	5.89941e-17	0.283224	1.54109e-07	5.82228e-09	1.54338e-05	4.26772e-11	2.32701e-11	0.131276	1	0.798691	0.816014			SB203580	54.0263	0.328177	164.625	1.88562e-196	-6.55499	1.16774	8.46437	8.20664	-0.652491	2.4646	5.70296	5.96339	-0.361182	3.06797	4.84077	4.82146	6.84688	5.78021
1	MAPK14	1	AMG548	4.93945e-25		5	3	GSK3a		ERK11e	4.93945e-25	0.000706757	4.67838e-29	1.86998e-29	0.419287	4.90533e-06	4.47043e-19	5.88066e-18	0.51945	3.11878e-08	1.89883e-09	8.53758e-06	2.96229e-12	1.05804e-12	0.0954622	0.798691	1	0.943546			ERK11e	54.1086	0.304504	177.694	2.54438e-202	-6.47267	1.25006	8.54668	8.28896	-0.570171	2.54692	5.78528	6.04571	-0.278862	3.15029	4.92309	4.90378	6.9292	5.86253
1	MAPK14	1	AMG548	1.47358e-24		5	4	GSK3a		DMSO	1.47358e-24	0.00608697	6.03874e-26	1.98255e-26	0.327283	0.000111619	6.10131e-16	1.98686e-15	0.51274	1.18653e-06	1.95523e-08	2.52612e-05	1.32687e-09	1.22252e-09	0.237891	0.816014	0.943546	1			DMSO	53.9735	0.30538	176.742	6.58448e-202	-6.60785	1.11488	8.41151	8.15379	-0.705347	2.41175	5.65011	5.91053	-0.414037	3.01511	4.78791	4.76861	6.79403	5.72736
1	MAPK14	2	SB203580	1.63162e-30		1	1	MAPK14	MAPK14	AMG548
1	MAPK14	2	SB203580	1		1	2	MAPK14	MAPK14	SB203580
1	MAPK14	2	SB203580	1.23538e-24		1	3	MAPK14	MAPK14	ERK11e
1	MAPK14	2	SB203580	4.31683e-25		1	4	MAPK14	MAPK14	DMSO
1	MAPK14	2	SB203580	0.000291051		2	1	MAPKAPK3	MAPKAPK3	AMG548
1	MAPK14	2	SB203580	0.0336355		2	2	MAPKAPK3	MAPKAPK3	SB203580
1	MAPK14	2	SB203580	8.23464e-14		2	3	MAPKAPK3	MAPKAPK3	ERK11e
1	MAPK14	2	SB203580	1.83829e-13		2	4	MAPKAPK3	MAPKAPK3	DMSO
1	MAPK14	2	SB203580	0.012136		3	1	MAPKAPK2	MAPKAPK2	AMG548
1	MAPK14	2	SB203580	0.00182522		3	2	MAPKAPK2	MAPKAPK2	SB203580
1	MAPK14	2	SB203580	2.17727e-06		3	3	MAPKAPK2	MAPKAPK2	ERK11e
1	MAPK14	2	SB203580	0.000631966		3	4	MAPKAPK2	MAPKAPK2	DMSO
1	MAPK14	2	SB203580	1.05649e-08		4	3	MAPKAPK2p	MAPKAPK2p	ERK11e
1	MAPK14	2	SB203580	1.7586e-08		4	4	MAPKAPK2p	MAPKAPK2p	DMSO
1	MAPK14	2	SB203580	0.120338		5	1	GSK3a	GSK3a	AMG548
1	MAPK14	2	SB203580	0.000767711		5	2	GSK3a	GSK3a	SB203580
1	MAPK14	2	SB203580	0.000706757		5	3	GSK3a	GSK3a	ERK11e
1	MAPK14	2	SB203580	0.00608697		5	4	GSK3a	GSK3a	DMSO
1	MAPK14	3	ERK11e	9.56462e-46		1	1	MAPK14	MAPK14	AMG548
1	MAPK14	3	ERK11e	1.23538e-24		1	2	MAPK14	MAPK14	SB203580
1	MAPK14	3	ERK11e	1		1	3	MAPK14	MAPK14	ERK11e
1	MAPK14	3	ERK11e	0.170013		1	4	MAPK14	MAPK14	DMSO
1	MAPK14	3	ERK11e	1.16417e-25		2	1	MAPKAPK3	MAPKAPK3	AMG548
1	MAPK14	3	ERK11e	5.68329e-17		2	2	MAPKAPK3	MAPKAPK3	SB203580
1	MAPK14	3	ERK11e	1.06619e-06		2	3	MAPKAPK3	MAPKAPK3	ERK11e
1	MAPK14	3	ERK11e	5.98018e-06		2	4	MAPKAPK3	MAPKAPK3	DMSO
1	MAPK14	3	ERK11e	8.44921e-24		3	1	MAPKAPK2	MAPKAPK2	AMG548
1	MAPK14	3	ERK11e	2.18477e-15		3	2	MAPKAPK2	MAPKAPK2	SB203580
1	MAPK14	3	ERK11e	1.65792e-06		3	3	MAPKAPK2	MAPKAPK2	ERK11e
1	MAPK14	3	ERK11e	0.00025728		3	4	MAPKAPK2	MAPKAPK2	DMSO
1	MAPK14	3	ERK11e	0.0796385		4	3	MAPKAPK2p	MAPKAPK2p	ERK11e
1	MAPK14	3	ERK11e	0.000587351		4	4	MAPKAPK2p	MAPKAPK2p	DMSO
1	MAPK14	3	ERK11e	2.22038e-32		5	1	GSK3a	GSK3a	AMG548
1	MAPK14	3	ERK11e	4.01311e-28		5	2	GSK3a	GSK3a	SB203580
1	MAPK14	3	ERK11e	4.67838e-29		5	3	GSK3a	GSK3a	ERK11e
1	MAPK14	3	ERK11e	6.03874e-26		5	4	GSK3a	GSK3a	DMSO
1	MAPK14	4	DMSO	4.12595e-46		1	1	MAPK14	MAPK14	AMG548
1	MAPK14	4	DMSO	4.31683e-25		1	2	MAPK14	MAPK14	SB203580
1	MAPK14	4	DMSO	0.170013		1	3	MAPK14	MAPK14	ERK11e
1	MAPK14	4	DMSO	1		1	4	MAPK14	MAPK14	DMSO
1	MAPK14	4	DMSO	2.18604e-26		2	1	MAPKAPK3	MAPKAPK3	AMG548
1	MAPK14	4	DMSO	2.4001e-17		2	2	MAPKAPK3	MAPKAPK3	SB203580
1	MAPK14	4	DMSO	5.75278e-07		2	3	MAPKAPK3	MAPKAPK3	ERK11e
1	MAPK14	4	DMSO	1.53858e-05		2	4	MAPKAPK3	MAPKAPK3	DMSO
1	MAPK14	4	DMSO	1.67951e-24		3	1	MAPKAPK2	MAPKAPK2	AMG548
1	MAPK14	4	DMSO	1.01154e-15		3	2	MAPKAPK2	MAPKAPK2	SB203580
1	MAPK14	4	DMSO	1.68387e-06		3	3	MAPKAPK2	MAPKAPK2	ERK11e
1	MAPK14	4	DMSO	0.000281873		3	4	MAPKAPK2	MAPKAPK2	DMSO
1	MAPK14	4	DMSO	0.0181948		4	3	MAPKAPK2p	MAPKAPK2p	ERK11e
1	MAPK14	4	DMSO	0.000718782		4	4	MAPKAPK2p	MAPKAPK2p	DMSO
1	MAPK14	4	DMSO	2.97101e-33		5	1	GSK3a	GSK3a	AMG548
1	MAPK14	4	DMSO	1.49632e-28		5	2	GSK3a	GSK3a	SB203580
1	MAPK14	4	DMSO	1.86998e-29		5	3	GSK3a	GSK3a	ERK11e
1	MAPK14	4	DMSO	1.98255e-26		5	4	GSK3a	GSK3a	DMSO
2	MAPKAPK3	1	AMG548	6.07825e-23		1	1	MAPK14	MAPK14	AMG548
2	MAPKAPK3	1	AMG548	0.000291051		1	2	MAPK14	MAPK14	SB203580
2	MAPKAPK3	1	AMG548	1.16417e-25		1	3	MAPK14	MAPK14	ERK11e
2	MAPKAPK3	1	AMG548	2.18604e-26		1	4	MAPK14	MAPK14	DMSO
2	MAPKAPK3	1	AMG548	1		2	1	MAPKAPK3	MAPKAPK3	AMG548
2	MAPKAPK3	1	AMG548	2.93201e-05		2	2	MAPKAPK3	MAPKAPK3	SB203580
2	MAPKAPK3	1	AMG548	7.74898e-15		2	3	MAPKAPK3	MAPKAPK3	ERK11e
2	MAPKAPK3	1	AMG548	3.67279e-15		2	4	MAPKAPK3	MAPKAPK3	DMSO
2	MAPKAPK3	1	AMG548	0.168727		3	1	MAPKAPK2	MAPKAPK2	AMG548
2	MAPKAPK3	1	AMG548	3.42943e-07		3	2	MAPKAPK2	MAPKAPK2	SB203580
2	MAPKAPK3	1	AMG548	3.99428e-10		3	3	MAPKAPK2	MAPKAPK2	ERK11e
2	MAPKAPK3	1	AMG548	2.74587e-07		3	4	MAPKAPK2	MAPKAPK2	DMSO
2	MAPKAPK3	1	AMG548	1.29724e-07		4	3	MAPKAPK2p	MAPKAPK2p	ERK11e
2	MAPKAPK3	1	AMG548	2.20108e-07		4	4	MAPKAPK2p	MAPKAPK2p	DMSO
2	MAPKAPK3	1	AMG548	0.00811668		5	1	GSK3a	GSK3a	AMG548
2	MAPKAPK3	1	AMG548	0.484746		5	2	GSK3a	GSK3a	SB203580
2	MAPKAPK3	1	AMG548	0.419287		5	3	GSK3a	GSK3a	ERK11e
2	MAPKAPK3	1	AMG548	0.327283		5	4	GSK3a	GSK3a	DMSO
2	MAPKAPK3	2	SB203580	1.27876e-26		1	1	MAPK14	MAPK14	AMG548
2	MAPKAPK3	2	SB203580	0.0336355		1	2	MAPK14	MAPK14	SB203580
2	MAPKAPK3	2	SB203580	5.68329e-17		1	3	MAPK14	MAPK14	ERK11e
2	MAPKAPK3	2	SB203580	2.4001e-17		1	4	MAPK14	MAPK14	DMSO
2	MAPKAPK3	2	SB203580	2.93201e-05		2	1	MAPKAPK3	MAPKAPK3	AMG548
2	MAPKAPK3	2	SB203580	1		2	2	MAPKAPK3	MAPKAPK3	SB203580
2	MAPKAPK3	2	SB203580	2.61333e-07		2	3	MAPKAPK3	MAPKAPK3	ERK11e
2	MAPKAPK3	2	SB203580	2.15404e-07		2	4	MAPKAPK3	MAPKAPK3	DMSO
2	MAPKAPK3	2	SB203580	0.0002496		3	1	MAPKAPK2	MAPKAPK2	AMG548
2	MAPKAPK3	2	SB203580	0.395429		3	2	MAPKAPK2	MAPKAPK2	SB203580
2	MAPKAPK3	2	SB203580	0.00502307		3	3	MAPKAPK2	MAPKAPK2	ERK11e
2	MAPKAPK3	2	SB203580	0.0611909		3	4	MAPKAPK2	MAPKAPK2	DMSO
2	MAPKAPK3	2	SB203580	5.44754e-05		4	3	MAPKAPK2p	MAPKAPK2p	ERK11e
2	MAPKAPK3	2	SB203580	0.00017357		4	4	MAPKAPK2p	MAPKAPK2p	DMSO
2	MAPKAPK3	2	SB203580	0.00279859		5	1	GSK3a	GSK3a	AMG548
2	MAPKAPK3	2	SB203580	2.1498e-05		5	2	GSK3a	GSK3a	SB203580
2	MAPKAPK3	2	SB203580	4.90533e-06		5	3	GSK3a	GSK3a	ERK11e
2	MAPKAPK3	2	SB203580	0.000111619		5	4	GSK3a	GSK3a	DMSO
2	MAPKAPK3	3	ERK11e	2.08504e-34		1	1	MAPK14	MAPK14	AMG548
2	MAPKAPK3	3	ERK11e	8.23464e-14		1	2	MAPK14	MAPK14	SB203580
2	MAPKAPK3	3	ERK11e	1.06619e-06		1	3	MAPK14	MAPK14	ERK11e
2	MAPKAPK3	3	ERK11e	5.75278e-07		1	4	MAPK14	MAPK14	DMSO
2	MAPKAPK3	3	ERK11e	7.74898e-15		2	1	MAPKAPK3	MAPKAPK3	AMG548
2	MAPKAPK3	3	ERK11e	2.61333e-07		2	2	MAPKAPK3	MAPKAPK3	SB203580
2	MAPKAPK3	3	ERK11e	1		2	3	MAPKAPK3	MAPKAPK3	ERK11e
2	MAPKAPK3	3	ERK11e	0.573314		2	4	MAPKAPK3	MAPKAPK3	DMSO
2	MAPKAPK3	3	ERK11e	2.40188e-13		3	1	MAPKAPK2	MAPKAPK2	AMG548
2	MAPKAPK3	3	ERK11e	7.35432e-06		3	2	MAPKAPK2	MAPKAPK2	SB203580
2	MAPKAPK3	3	ERK11e	0.18696		3	3	MAPKAPK2	MAPKAPK2	ERK11e
2	MAPKAPK3	3	ERK11e	0.418199		3	4	MAPKAPK2	MAPKAPK2	DMSO
2	MAPKAPK3	3	ERK11e	0.156758		4	3	MAPKAPK2p	MAPKAPK2p	ERK11e
2	MAPKAPK3	3	ERK11e	0.906747		4	4	MAPKAPK2p	MAPKAPK2p	DMSO
2	MAPKAPK3	3	ERK11e	1.58476e-17		5	1	GSK3a	GSK3a	AMG548
2	MAPKAPK3	3	ERK11e	8.0374e-18		5	2	GSK3a	GSK3a	SB203580
2	MAPKAPK3	3	ERK11e	4.47043e-19		5	3	GSK3a	GSK3a	ERK11e
2	MAPKAPK3	3	ERK11e	6.10131e-16		5	4	GSK3a	GSK3a	DMSO
2	MAPKAPK3	4	DMSO	4.97773e-34		1	1	MAPK14	MAPK14	AMG548
2	MAPKAPK3	4	DMSO	1.83829e-13		1	2	MAPK14	MAPK14	SB203580
2	MAPKAPK3	4	DMSO	5.98018e-06		1	3	MAPK14	MAPK14	ERK11e
2	MAPKAPK3	4	DMSO	1.53858e-05		1	4	MAPK14	MAPK14	DMSO
2	MAPKAPK3	4	DMSO	3.67279e-15		2	1	MAPKAPK3	MAPKAPK3	AMG548
2	MAPKAPK3	4	DMSO	2.15404e-07		2	2	MAPKAPK3	MAPKAPK3	SB203580
2	MAPKAPK3	4	DMSO	0.573314		2	3	MAPKAPK3	MAPKAPK3	ERK11e
2	MAPKAPK3	4	DMSO	1		2	4	MAPKAPK3	MAPKAPK3	DMSO
2	MAPKAPK3	4	DMSO	8.35998e-14		3	1	MAPKAPK2	MAPKAPK2	AMG548
2	MAPKAPK3	4	DMSO	4.48116e-06		3	2	MAPKAPK2	MAPKAPK2	SB203580
2	MAPKAPK3	4	DMSO	0.156952		3	3	MAPKAPK2	MAPKAPK2	ERK11e
2	MAPKAPK3	4	DMSO	0.362044		3	4	MAPKAPK2	MAPKAPK2	DMSO
2	MAPKAPK3	4	DMSO	0.135503		4	3	MAPKAPK2p	MAPKAPK2p	ERK11e
2	MAPKAPK3	4	DMSO	0.919109		4	4	MAPKAPK2p	MAPKAPK2p	DMSO
2	MAPKAPK3	4	DMSO	8.12999e-18		5	1	GSK3a	GSK3a	AMG548
2	MAPKAPK3	4	DMSO	5.89941e-17		5	2	GSK3a	GSK3a	SB203580
2	MAPKAPK3	4	DMSO	5.88066e-18		5	3	GSK3a	GSK3a	ERK11e
2	MAPKAPK3	4	DMSO	1.98686e-15		5	4	GSK3a	GSK3a	DMSO
3	MAPKAPK2	1	AMG548	2.91427e-24		1	1	MAPK14	MAPK14	AMG548
3	MAPKAPK2	1	AMG548	0.012136		1	2	MAPK14	MAPK14	SB203580
3	MAPKAPK2	1	AMG548	8.44921e-24		1	3	MAPK14	MAPK14	ERK11e
3	MAPKAPK2	1	AMG548	1.67951e-24		1	4	MAPK14	MAPK14	DMSO
3	MAPKAPK2	1	AMG548	0.168727		2	1	MAPKAPK3	MAPKAPK3	AMG548
3	MAPKAPK2	1	AMG548	0.0002496		2	2	MAPKAPK3	MAPKAPK3	SB203580
3	MAPKAPK2	1	AMG548	2.40188e-13		2	3	MAPKAPK3	MAPKAPK3	ERK11e
3	MAPKAPK2	1	AMG548	8.35998e-14		2	4	MAPKAPK3	MAPKAPK3	DMSO
3	MAPKAPK2	1	AMG548	1		3	1	MAPKAPK2	MAPKAPK2	AMG548
3	MAPKAPK2	1	AMG548	5.70355e-06		3	2	MAPKAPK2	MAPKAPK2	SB203580
3	MAPKAPK2	1	AMG548	2.17352e-09		3	3	MAPKAPK2	MAPKAPK2	ERK11e
3	MAPKAPK2	1	AMG548	5.21023e-07		3	4	MAPKAPK2	MAPKAPK2	DMSO
3	MAPKAPK2	1	AMG548	1.49822e-06		4	3	MAPKAPK2p	MAPKAPK2p	ERK11e
3	MAPKAPK2	1	AMG548	2.54088e-06		4	4	MAPKAPK2p	MAPKAPK2p	DMSO
3	MAPKAPK2	1	AMG548	0.0196003		5	1	GSK3a	GSK3a	AMG548
3	MAPKAPK2	1	AMG548	0.283224		5	2	GSK3a	GSK3a	SB203580
3	MAPKAPK2	1	AMG548	0.51945		5	3	GSK3a	GSK3a	ERK11e
3	MAPKAPK2	1	AMG548	0.51274		5	4	GSK3a	GSK3a	DMSO
3	MAPKAPK2	2	SB203580	3.30393e-28		1	1	MAPK14	MAPK14	AMG548
3	MAPKAPK2	2	SB203580	0.00182522		1	2	MAPK14	MAPK14	SB203580
3	MAPKAPK2	2	SB203580	2.18477e-15		1	3	MAPK14	MAPK14	ERK11e
3	MAPKAPK2	2	SB203580	1.01154e-15		1	4	MAPK14	MAPK14	DMSO
3	MAPKAPK2	2	SB203580	3.42943e-07		2	1	MAPKAPK3	MAPKAPK3	AMG548
3	MAPKAPK2	2	SB203580	0.395429		2	2	MAPKAPK3	MAPKAPK3	SB203580
3	MAPKAPK2	2	SB203580	7.35432e-06		2	3	MAPKAPK3	MAPKAPK3	ERK11e
3	MAPKAPK2	2	SB203580	4.48116e-06		2	4	MAPKAPK3	MAPKAPK3	DMSO
3	MAPKAPK2	2	SB203580	5.70355e-06		3	1	MAPKAPK2	MAPKAPK2	AMG548
3	MAPKAPK2	2	SB203580	1		3	2	MAPKAPK2	MAPKAPK2	SB203580
3	MAPKAPK2	2	SB203580	0.0357421		3	3	MAPKAPK2	MAPKAPK2	ERK11e
3	MAPKAPK2	2	SB203580	0.179122		3	4	MAPKAPK2	MAPKAPK2	DMSO
3	MAPKAPK2	2	SB203580	0.000356552		4	3	MAPKAPK2p	MAPKAPK2p	ERK11e
3	MAPKAPK2	2	SB203580	0.00191758		4	4	MAPKAPK2p	MAPKAPK2p	DMSO
3	MAPKAPK2	2	SB203580	1.57703e-05		5	1	GSK3a	GSK3a	AMG548
3	MAPKAPK2	2	SB203580	1.54109e-07		5	2	GSK3a	GSK3a	SB203580
3	MAPKAPK2	2	SB203580	3.11878e-08		5	3	GSK3a	GSK3a	ERK11e
3	MAPKAPK2	2	SB203580	1.18653e-06		5	4	GSK3a	GSK3a	DMSO
3	MAPKAPK2	3	ERK11e	7.97398e-28		1	1	MAPK14	MAPK14	AMG548
3	MAPKAPK2	3	ERK11e	2.17727e-06		1	2	MAPK14	MAPK14	SB203580
3	MAPKAPK2	3	ERK11e	1.65792e-06		1	3	MAPK14	MAPK14	ERK11e
3	MAPKAPK2	3	ERK11e	1.68387e-06		1	4	MAPK14	MAPK14	DMSO
3	MAPKAPK2	3	ERK11e	3.99428e-10		2	1	MAPKAPK3	MAPKAPK3	AMG548
3	MAPKAPK2	3	ERK11e	0.00502307		2	2	MAPKAPK3	MAPKAPK3	SB203580
3	MAPKAPK2	3	ERK11e	0.18696		2	3	MAPKAPK3	MAPKAPK3	ERK11e
3	MAPKAPK2	3	ERK11e	0.156952		2	4	MAPKAPK3	MAPKAPK3	DMSO
3	MAPKAPK2	3	ERK11e	2.17352e-09		3	1	MAPKAPK2	MAPKAPK2	AMG548
3	MAPKAPK2	3	ERK11e	0.0357421		3	2	MAPKAPK2	MAPKAPK2	SB203580
3	MAPKAPK2	3	ERK11e	1		3	3	MAPKAPK2	MAPKAPK2	ERK11e
3	MAPKAPK2	3	ERK11e	0.99341		3	4	MAPKAPK2	MAPKAPK2	DMSO
3	MAPKAPK2	3	ERK11e	0.142324		4	3	MAPKAPK2p	MAPKAPK2p	ERK11e
3	MAPKAPK2	3	ERK11e	0.534864		4	4	MAPKAPK2p	MAPKAPK2p	DMSO
3	MAPKAPK2	3	ERK11e	6.3304e-10		5	1	GSK3a	GSK3a	AMG548
3	MAPKAPK2	3	ERK11e	5.82228e-09		5	2	GSK3a	GSK3a	SB203580
3	MAPKAPK2	3	ERK11e	1.89883e-09		5	3	GSK3a	GSK3a	ERK11e
3	MAPKAPK2	3	ERK11e	1.95523e-08		5	4	GSK3a	GSK3a	DMSO
3	MAPKAPK2	4	DMSO	2.98691e-22		1	1	MAPK14	MAPK14	AMG548
3	MAPKAPK2	4	DMSO	0.000631966		1	2	MAPK14	MAPK14	SB203580
3	MAPKAPK2	4	DMSO	0.00025728		1	3	MAPK14	MAPK14	ERK11e
3	MAPKAPK2	4	DMSO	0.000281873		1	4	MAPK14	MAPK14	DMSO
3	MAPKAPK2	4	DMSO	2.74587e-07		2	1	MAPKAPK3	MAPKAPK3	AMG548
3	MAPKAPK2	4	DMSO	0.0611909		2	2	MAPKAPK3	MAPKAPK3	SB203580
3	MAPKAPK2	4	DMSO	0.418199		2	3	MAPKAPK3	MAPKAPK3	ERK11e
3	MAPKAPK2	4	DMSO	0.362044		2	4	MAPKAPK3	MAPKAPK3	DMSO
3	MAPKAPK2	4	DMSO	5.21023e-07		3	1	MAPKAPK2	MAPKAPK2	AMG548
3	MAPKAPK2	4	DMSO	0.179122		3	2	MAPKAPK2	MAPKAPK2	SB203580
3	MAPKAPK2	4	DMSO	0.99341		3	3	MAPKAPK2	MAPKAPK2	ERK11e
3	MAPKAPK2	4	DMSO	1		3	4	MAPKAPK2	MAPKAPK2	DMSO
3	MAPKAPK2	4	DMSO	0.387215		4	3	MAPKAPK2p	MAPKAPK2p	ERK11e
3	MAPKAPK2	4	DMSO	0.75447		4	4	MAPKAPK2p	MAPKAPK2p	DMSO
3	MAPKAPK2	4	DMSO	1.59525e-06		5	1	GSK3a	GSK3a	AMG548
3	MAPKAPK2	4	DMSO	1.54338e-05		5	2	GSK3a	GSK3a	SB203580
3	MAPKAPK2	4	DMSO	8.53758e-06		5	3	GSK3a	GSK3a	ERK11e
3	MAPKAPK2	4	DMSO	2.52612e-05		5	4	GSK3a	GSK3a	DMSO
4	MAPKAPK2p	3	ERK11e	4.69547e-17		1	1	MAPK14	MAPK14	AMG548
4	MAPKAPK2p	3	ERK11e	1.05649e-08		1	2	MAPK14	MAPK14	SB203580
4	MAPKAPK2p	3	ERK11e	0.0796385		1	3	MAPK14	MAPK14	ERK11e
4	MAPKAPK2p	3	ERK11e	0.0181948		1	4	MAPK14	MAPK14	DMSO
4	MAPKAPK2p	3	ERK11e	1.29724e-07		2	1	MAPKAPK3	MAPKAPK3	AMG548
4	MAPKAPK2p	3	ERK11e	5.44754e-05		2	2	MAPKAPK3	MAPKAPK3	SB203580
4	MAPKAPK2p	3	ERK11e	0.156758		2	3	MAPKAPK3	MAPKAPK3	ERK11e
4	MAPKAPK2p	3	ERK11e	0.135503		2	4	MAPKAPK3	MAPKAPK3	DMSO
4	MAPKAPK2p	3	ERK11e	1.49822e-06		3	1	MAPKAPK2	MAPKAPK2	AMG548
4	MAPKAPK2p	3	ERK11e	0.000356552		3	2	MAPKAPK2	MAPKAPK2	SB203580
4	MAPKAPK2p	3	ERK11e	0.142324		3	3	MAPKAPK2	MAPKAPK2	ERK11e
4	MAPKAPK2p	3	ERK11e	0.387215		3	4	MAPKAPK2	MAPKAPK2	DMSO
4	MAPKAPK2p	3	ERK11e	1		4	3	MAPKAPK2p	MAPKAPK2p	ERK11e
4	MAPKAPK2p	3	ERK11e	0.131304		4	4	MAPKAPK2p	MAPKAPK2p	DMSO
4	MAPKAPK2p	3	ERK11e	8.45168e-10		5	1	GSK3a	GSK3a	AMG548
4	MAPKAPK2p	3	ERK11e	4.26772e-11		5	2	GSK3a	GSK3a	SB203580
4	MAPKAPK2p	3	ERK11e	2.96229e-12		5	3	GSK3a	GSK3a	ERK11e
4	MAPKAPK2p	3	ERK11e	1.32687e-09		5	4	GSK3a	GSK3a	DMSO
4	MAPKAPK2p	4	DMSO	3.4361e-17		1	1	MAPK14	MAPK14	AMG548
4	MAPKAPK2p	4	DMSO	1.7586e-08		1	2	MAPK14	MAPK14	SB203580
4	MAPKAPK2p	4	DMSO	0.000587351		1	3	MAPK14	MAPK14	ERK11e
4	MAPKAPK2p	4	DMSO	0.000718782		1	4	MAPK14	MAPK14	DMSO
4	MAPKAPK2p	4	DMSO	2.20108e-07		2	1	MAPKAPK3	MAPKAPK3	AMG548
4	MAPKAPK2p	4	DMSO	0.00017357		2	2	MAPKAPK3	MAPKAPK3	SB203580
4	MAPKAPK2p	4	DMSO	0.906747		2	3	MAPKAPK3	MAPKAPK3	ERK11e
4	MAPKAPK2p	4	DMSO	0.919109		2	4	MAPKAPK3	MAPKAPK3	DMSO
4	MAPKAPK2p	4	DMSO	2.54088e-06		3	1	MAPKAPK2	MAPKAPK2	AMG548
4	MAPKAPK2p	4	DMSO	0.00191758		3	2	MAPKAPK2	MAPKAPK2	SB203580
4	MAPKAPK2p	4	DMSO	0.534864		3	3	MAPKAPK2	MAPKAPK2	ERK11e
4	MAPKAPK2p	4	DMSO	0.75447		3	4	MAPKAPK2	MAPKAPK2	DMSO
4	MAPKAPK2p	4	DMSO	0.131304		4	3	MAPKAPK2p	MAPKAPK2p	ERK11e
4	MAPKAPK2p	4	DMSO	1		4	4	MAPKAPK2p	MAPKAPK2p	DMSO
4	MAPKAPK2p	4	DMSO	2.35811e-09		5	1	GSK3a	GSK3a	AMG548
4	MAPKAPK2p	4	DMSO	2.32701e-11		5	2	GSK3a	GSK3a	SB203580
4	MAPKAPK2p	4	DMSO	1.05804e-12		5	3	GSK3a	GSK3a	ERK11e
4	MAPKAPK2p	4	DMSO	1.22252e-09		5	4	GSK3a	GSK3a	DMSO
5	GSK3a	1	AMG548	1.85701e-37		1	1	MAPK14	MAPK14	AMG548
5	GSK3a	1	AMG548	0.120338		1	2	MAPK14	MAPK14	SB203580
5	GSK3a	1	AMG548	2.22038e-32		1	3	MAPK14	MAPK14	ERK11e
5	GSK3a	1	AMG548	2.97101e-33		1	4	MAPK14	MAPK14	DMSO
5	GSK3a	1	AMG548	0.00811668		2	1	MAPKAPK3	MAPKAPK3	AMG548
5	GSK3a	1	AMG548	0.00279859		2	2	MAPKAPK3	MAPKAPK3	SB203580
5	GSK3a	1	AMG548	1.58476e-17		2	3	MAPKAPK3	MAPKAPK3	ERK11e
5	GSK3a	1	AMG548	8.12999e-18		2	4	MAPKAPK3	MAPKAPK3	DMSO
5	GSK3a	1	AMG548	0.0196003		3	1	MAPKAPK2	MAPKAPK2	AMG548
5	GSK3a	1	AMG548	1.57703e-05		3	2	MAPKAPK2	MAPKAPK2	SB203580
5	GSK3a	1	AMG548	6.3304e-10		3	3	MAPKAPK2	MAPKAPK2	ERK11e
5	GSK3a	1	AMG548	1.59525e-06		3	4	MAPKAPK2	MAPKAPK2	DMSO
5	GSK3a	1	AMG548	8.45168e-10		4	3	MAPKAPK2p	MAPKAPK2p	ERK11e
5	GSK3a	1	AMG548	2.35811e-09		4	4	MAPKAPK2p	MAPKAPK2p	DMSO
5	GSK3a	1	AMG548	1		5	1	GSK3a	GSK3a	AMG548
5	GSK3a	1	AMG548	0.131276		5	2	GSK3a	GSK3a	SB203580
5	GSK3a	1	AMG548	0.0954622		5	3	GSK3a	GSK3a	ERK11e
5	GSK3a	1	AMG548	0.237891		5	4	GSK3a	GSK3a	DMSO
5	GSK3a	2	SB203580	1.85751e-24		1	1	MAPK14	MAPK14	AMG548
5	GSK3a	2	SB203580	0.000767711		1	2	MAPK14	MAPK14	SB203580
5	GSK3a	2	SB203580	4.01311e-28		1	3	MAPK14	MAPK14	ERK11e
5	GSK3a	2	SB203580	1.49632e-28		1	4	MAPK14	MAPK14	DMSO
5	GSK3a	2	SB203580	0.484746		2	1	MAPKAPK3	MAPKAPK3	AMG548
5	GSK3a	2	SB203580	2.1498e-05		2	2	MAPKAPK3	MAPKAPK3	SB203580
5	GSK3a	2	SB203580	8.0374e-18		2	3	MAPKAPK3	MAPKAPK3	ERK11e
5	GSK3a	2	SB203580	5.89941e-17		2	4	MAPKAPK3	MAPKAPK3	DMSO
5	GSK3a	2	SB203580	0.283224		3	1	MAPKAPK2	MAPKAPK2	AMG548
5	GSK3a	2	SB203580	1.54109e-07		3	2	MAPKAPK2	MAPKAPK2	SB203580
5	GSK3a	2	SB203580	5.82228e-09		3	3	MAPKAPK2	MAPKAPK2	ERK11e
5	GSK3a	2	SB203580	1.54338e-05		3	4	MAPKAPK2	MAPKAPK2	DMSO
5	GSK3a	2	SB203580	4.26772e-11		4	3	MAPKAPK2p	MAPKAPK2p	ERK11e
5	GSK3a	2	SB203580	2.32701e-11		4	4	MAPKAPK2p	MAPKAPK2p	DMSO
5	GSK3a	2	SB203580	0.131276		5	1	GSK3a	GSK3a	AMG548
5	GSK3a	2	SB203580	1		5	2	GSK3a	GSK3a	SB203580
5	GSK3a	2	SB203580	0.798691		5	3	GSK3a	GSK3a	ERK11e
5	GSK3a	2	SB203580	0.816014		5	4	GSK3a	GSK3a	DMSO
5	GSK3a	3	ERK11e	4.93945e-25		1	1	MAPK14	MAPK14	AMG548
5	GSK3a	3	ERK11e	0.000706757		1	2	MAPK14	MAPK14	SB203580
5	GSK3a	3	ERK11e	4.67838e-29		1	3	MAPK14	MAPK14	ERK11e
5	GSK3a	3	ERK11e	1.86998e-29		1	4	MAPK14	MAPK14	DMSO
5	GSK3a	3	ERK11e	0.419287		2	1	MAPKAPK3	MAPKAPK3	AMG548
5	GSK3a	3	ERK11e	4.90533e-06		2	2	MAPKAPK3	MAPKAPK3	SB203580
5	GSK3a	3	ERK11e	4.47043e-19		2	3	MAPKAPK3	MAPKAPK3	ERK11e
5	GSK3a	3	ERK11e	5.88066e-18		2	4	MAPKAPK3	MAPKAPK3	DMSO
5	GSK3a	3	ERK11e	0.51945		3	1	MAPKAPK2	MAPKAPK2	AMG548
5	GSK3a	3	ERK11e	3.11878e-08		3	2	MAPKAPK2	MAPKAPK2	SB203580
5	GSK3a	3	ERK11e	1.89883e-09		3	3	MAPKAPK2	MAPKAPK2	ERK11e
5	GSK3a	3	ERK11e	8.53758e-06		3	4	MAPKAPK2	MAPKAPK2	DMSO
5	GSK3a	3	ERK11e	2.96229e-12		4	3	MAPKAPK2p	MAPKAPK2p	ERK11e
5	GSK3a	3	ERK11e	1.05804e-12		4	4	MAPKAPK2p	MAPKAPK2p	DMSO
5	GSK3a	3	ERK11e	0.0954622		5	1	GSK3a	GSK3a	AMG548
5	GSK3a	3	ERK11e	0.798691		5	2	GSK3a	GSK3a	SB203580
5	GSK3a	3	ERK11e	1		5	3	GSK3a	GSK3a	ERK11e
5	GSK3a	3	ERK11e	0.943546		5	4	GSK3a	GSK3a	DMSO
5	GSK3a	4	DMSO	1.47358e-24		1	1	MAPK14	MAPK14	AMG548
5	GSK3a	4	DMSO	0.00608697		1	2	MAPK14	MAPK14	SB203580
5	GSK3a	4	DMSO	6.03874e-26		1	3	MAPK14	MAPK14	ERK11e
5	GSK3a	4	DMSO	1.98255e-26		1	4	MAPK14	MAPK14	DMSO
5	GSK3a	4	DMSO	0.327283		2	1	MAPKAPK3	MAPKAPK3	AMG548
5	GSK3a	4	DMSO	0.000111619		2	2	MAPKAPK3	MAPKAPK3	SB203580
5	GSK3a	4	DMSO	6.10131e-16		2	3	MAPKAPK3	MAPKAPK3	ERK11e
5	GSK3a	4	DMSO	1.98686e-15		2	4	MAPKAPK3	MAPKAPK3	DMSO
5	GSK3a	4	DMSO	0.51274		3	1	MAPKAPK2	MAPKAPK2	AMG548
5	GSK3a	4	DMSO	1.18653e-06		3	2	MAPKAPK2	MAPKAPK2	SB203580
5	GSK3a	4	DMSO	1.95523e-08		3	3	MAPKAPK2	MAPKAPK2	ERK11e
5	GSK3a	4	DMSO	2.52612e-05		3	4	MAPKAPK2	MAPKAPK2	DMSO
5	GSK3a	4	DMSO	1.32687e-09		4	3	MAPKAPK2p	MAPKAPK2p	ERK11e
5	GSK3a	4	DMSO	1.22252e-09		4	4	MAPKAPK2p	MAPKAPK2p	DMSO
5	GSK3a	4	DMSO	0.237891		5	1	GSK3a	GSK3a	AMG548
5	GSK3a	4	DMSO	0.816014		5	2	GSK3a	GSK3a	SB203580
5	GSK3a	4	DMSO	0.943546		5	3	GSK3a	GSK3a	ERK11e
5	GSK3a	4	DMSO	1		5	4	GSK3a	GSK3a	DMSO
[truncated: 287 more columns]

## Sheet: Table_S6_pVal_extract_CETSA-WB
lysate																							lysate
Table S6. ANOVA p-values for comparing the null model (fit using one melting curve for the two conditions compared) to the alternative model (fit using two melting curves for the two conditions compared) for CETSA in cell extract. Cells are colored green for p ≤ 0.001, blue for 0.001 < p ≤ 0.01, and yellow for 0.01 < p ≤ 0.05, i.e. different alpha levels for statistical significance of rejecting …																							Tm difference						59.1475	56.8613	45.1537	45.5434	49.3073	47.419	46.1289	46.6809	51.0641	49.3475	48.3308	48.1029	50.948	49.0252	48.3359	48.1305	48.2577	49.7739	50.2547	49.0196
Protein		MAPK14				MAPKAPK3				MAPKAPK2				MAPKAPK2p				GSK3a					Protein						MAPK14				MAPKAPK3				MAPKAPK2				MAPKAPK2p				GSK3a
	Inhibitor	AMG548	SB203580	ERK11e	DMSO	AMG548	SB203580	ERK11e	DMSO	AMG548	SB203580	ERK11e	DMSO	AMG548	SB203580	ERK11e	DMSO	AMG548	SB203580	ERK11e	DMSO			Inhibitor					AMG548	SB203580	ERK11e	DMSO	AMG548	SB203580	ERK11e	DMSO	AMG548	SB203580	ERK11e	DMSO	AMG548	SB203580	ERK11e	DMSO	AMG548	SB203580	ERK11e	DMSO
MAPK14	AMG548	1	0.0392635	7.60642e-22	5.75135e-22	1.91723e-15	5.25635e-19	5.60638e-21	1.15904e-20	6.53105e-11	2.17647e-14	7.95043e-17	1.34544e-16	3.51342e-11	3.89644e-14	7.93311e-16	4.93156e-12	9.35641e-18	6.2136e-14	1.91613e-13	1.19865e-15		MAPK14	AMG548	59.1475	0.572781	103.264	1.25281e-123	0	2.28622	13.9938	13.6041	9.84021	11.7285	13.0186	12.4666	8.08342	9.80002	10.8167	11.0446	8.1995	10.1223	10.8116	11.017	10.8899	9.37362	8.89279	10.1279
	SB203580	0.0392635	1	6.09426e-26	2.66379e-26	2.53403e-17	3.34179e-22	2.40944e-25	6.70843e-25	3.69067e-10	6.26823e-15	1.29523e-18	3.02838e-18	1.00558e-10	4.46899e-15	2.83942e-17	2.65457e-12	1.05881e-20	5.32152e-15	3.26637e-14	1.56601e-17			SB203580	56.8613	0.452851	125.563	3.17422e-134	-2.28622	0	11.7076	11.3178	7.55398	9.44225	10.7324	10.1804	5.79719	7.5138	8.53052	8.75834	5.91327	7.83609	8.52535	8.73081	8.60364	7.08739	6.60656	7.84172
	ERK11e	7.60642e-22	6.09426e-26	1	0.637263	6.29656e-11	4.37775e-05	0.0201998	0.00147604	2.54356e-11	8.33209e-09	1.04994e-07	1.98738e-06	1.40666e-11	3.77341e-07	1.93671e-06	0.0049599	2.02885e-08	1.49224e-10	2.34858e-12	1.57148e-09			ERK11e	45.1537	0.53468	84.45	8.85698e-113	-13.9938	-11.7076	0	-0.389774	-4.15363	-2.26537	-0.975262	-1.5272	-5.91042	-4.19382	-3.17709	-2.94927	-5.79435	-3.87153	-3.18227	-2.97681	-3.10398	-4.62022	-5.10105	-3.86589
	DMSO	5.75135e-22	2.66379e-26	0.637263	1	1.13818e-10	0.000211581	0.0337931	0.00623393	6.79406e-11	3.27637e-08	5.95075e-07	1.09511e-05	3.2854e-11	1.22277e-06	9.8652e-06	0.0109614	6.17958e-08	3.11182e-10	4.23859e-12	4.19286e-09			DMSO	45.5434	0.517485	88.0093	5.31627e-115	-13.6041	-11.3178	0.389774	0	-3.76386	-1.8756	-0.585488	-1.13742	-5.52065	-3.80405	-2.78732	-2.5595	-5.40457	-3.48175	-2.7925	-2.58703	-2.7142	-4.23045	-4.71128	-3.47612
MAPKAPK3	AMG548	1.91723e-15	2.53403e-17	6.29656e-11	1.13818e-10	1	0.000870985	3.294e-08	8.96943e-07	0.00595225	0.0332217	0.00968941	0.00749449	0.0257837	0.664821	0.062103	0.414956	0.0809612	0.678326	0.216017	0.766086		MAPKAPK3	AMG548	49.3073	0.361788	136.288	1.11977e-138	-9.84021	-7.55398	4.15363	3.76386	0	1.88826	3.17837	2.62644	-1.75679	-0.0401875	0.976541	1.20436	-1.64071	0.282107	0.971361	1.17683	1.04966	-0.46659	-0.94742	0.287741
	SB203580	5.25635e-19	3.34179e-22	4.37775e-05	0.000211581	0.000870985	1	0.0106916	0.206244	3.34244e-06	0.0018457	0.0432813	0.0962577	4.39356e-06	0.0389781	0.159245	0.662923	0.164916	0.000301515	1.057e-05	0.00850733			SB203580	47.419	0.340883	139.107	8.63427e-140	-11.7285	-9.44225	2.26537	1.8756	-1.88826	0	1.29011	0.738174	-3.64505	-1.92845	-0.911721	-0.683901	-3.52897	-1.60615	-0.9169	-0.711436	-0.838606	-2.35485	-2.83568	-1.60052
	ERK11e	5.60638e-21	2.40944e-25	0.0201998	0.0337931	3.294e-08	0.0106916	1	0.244099	2.57277e-09	7.66828e-07	8.82416e-06	0.000102207	1.81681e-09	6.73649e-05	0.000184072	0.0951551	1.59842e-05	4.81431e-08	5.6984e-10	7.94396e-07			ERK11e	46.1289	0.388591	118.708	3.53243e-131	-13.0186	-10.7324	0.975262	0.585488	-3.17837	-1.29011	0	-0.551937	-4.93516	-3.21856	-2.20183	-1.97401	-4.81908	-2.89627	-2.20701	-2.00155	-2.12872	-3.64496	-4.12579	-2.89063
	DMSO	1.15904e-20	6.70843e-25	0.00147604	0.00623393	8.96943e-07	0.206244	0.244099	1	2.67934e-08	1.70456e-05	0.000462404	0.00305686	2.08258e-08	0.000838865	0.00459489	0.240456	0.000850275	7.77024e-07	1.06394e-08	2.33256e-05			DMSO	46.6809	0.360134	129.621	5.9492e-136	-12.4666	-10.1804	1.5272	1.13742	-2.62644	-0.738174	0.551937	0	-4.38323	-2.66662	-1.64989	-1.42208	-4.26715	-2.34433	-1.65507	-1.44961	-1.57678	-3.09303	-3.57386	-2.33869
MAPKAPK2	AMG548	6.53105e-11	3.69067e-10	2.54356e-11	6.79406e-11	0.00595225	3.34244e-06	2.57277e-09	2.67934e-08	1	0.0670942	0.000739189	0.000354054	0.674963	0.0154847	0.00126409	0.00523646	0.000119561	0.0539626	0.151358	0.00410032		MAPKAPK2	AMG548	51.0641	0.479359	106.526	3.12876e-122	-8.08342	-5.79719	5.91042	5.52065	1.75679	3.64505	4.93516	4.38323	0	1.7166	2.73333	2.96115	0.116079	2.0389	2.72815	2.93362	2.80645	1.2902	0.80937	2.04453
	SB203580	2.17647e-14	6.26823e-15	8.33209e-09	3.27637e-08	0.0332217	0.0018457	7.66828e-07	1.70456e-05	0.0670942	1	0.216997	0.126238	0.0548128	0.232717	0.183515	0.134662	0.0206023	0.114089	0.068234	0.0989158			SB203580	49.3475	0.457912	107.766	7.73065e-123	-9.80002	-7.5138	4.19382	3.80405	0.0401875	1.92845	3.21856	2.66662	-1.7166	0	1.01673	1.24455	-1.60052	0.322295	1.01155	1.21701	1.08984	-0.426403	-0.907233	0.327928
	ERK11e	7.95043e-17	1.29523e-18	1.04994e-07	5.95075e-07	0.00968941	0.0432813	8.82416e-06	0.000462404	0.000739189	0.216997	1	0.914215	0.000817354	0.207371	0.828745	0.407262	0.114056	0.0115776	0.00186995	0.0750724			ERK11e	48.3308	0.485926	99.4611	1.23032e-118	-10.8167	-8.53052	3.17709	2.78732	-0.976541	0.911721	2.20183	1.64989	-2.73333	-1.01673	0	0.22782	-2.61725	-0.694433	-0.00517943	0.200285	0.0731148	-1.44313	-1.92396	-0.6888
	DMSO	1.34544e-16	3.02838e-18	1.98738e-06	1.09511e-05	0.00749449	0.0962577	0.000102207	0.00305686	0.000354054	0.126238	0.914215	1	0.000410443	0.145516	0.756144	0.414543	0.128381	0.00670251	0.00101469	0.0531305			DMSO	48.1029	0.479192	100.383	4.04381e-119	-11.0446	-8.75834	2.94927	2.5595	-1.20436	0.683901	1.97401	1.42208	-2.96115	-1.24455	-0.22782	0	-2.84507	-0.922253	-0.232999	-0.0275351	-0.154705	-1.67095	-2.15178	-0.91662
MAPKAPK2p	AMG548	3.51342e-11	1.00558e-10	1.40666e-11	3.2854e-11	0.0257837	4.39356e-06	1.81681e-09	2.08258e-08	0.674963	0.0548128	0.000817354	0.000410443	1	0.0399737	0.00216461	0.0139586	0.000274815	0.175584	0.461602	0.0138761		MAPKAPK2p	AMG548	50.948	0.600683	84.8168	5.40509e-111	-8.1995	-5.91327	5.79435	5.40457	1.64071	3.52897	4.81908	4.26715	-0.116079	1.60052	2.61725	2.84507	0	1.92282	2.61207	2.81754	2.69037	1.17412	0.693291	1.92845
	SB203580	3.89644e-14	4.46899e-15	3.77341e-07	1.22277e-06	0.664821	0.0389781	6.73649e-05	0.000838865	0.0154847	0.232717	0.207371	0.145516	0.0399737	1	0.439395	0.629757	0.437383	0.513411	0.192974	0.945176			SB203580	49.0252	0.651383	75.2632	9.91832e-105	-10.1223	-7.83609	3.87153	3.48175	-0.282107	1.60615	2.89627	2.34433	-2.0389	-0.322295	0.694433	0.922253	-1.92282	0	0.689254	0.894718	0.767548	-0.748697	-1.22953	0.00563353
	ERK11e	7.93311e-16	2.83942e-17	1.93671e-06	9.8652e-06	0.062103	0.159245	0.000184072	0.00459489	0.00126409	0.183515	0.828745	0.756144	0.00216461	0.439395	1	0.654074	0.428492	0.0439375	0.00828025	0.251373			ERK11e	48.3359	0.580757	83.2293	5.30861e-110	-10.8116	-8.52535	3.18227	2.7925	-0.971361	0.9169	2.20701	1.65507	-2.72815	-1.01155	0.00517943	0.232999	-2.61207	-0.689254	0	0.205464	0.0782943	-1.43795	-1.91878	-0.68362
	DMSO	4.93156e-12	2.65457e-12	0.0049599	0.0109614	0.414956	0.662923	0.0951551	0.240456	0.00523646	0.134662	0.407262	0.414543	0.0139586	0.629757	0.654074	1	0.980888	0.210416	0.0703968	0.606883			DMSO	48.1305	0.700114	68.7467	5.27917e-100	-11.017	-8.73081	2.97681	2.58703	-1.17683	0.711436	2.00155	1.44961	-2.93362	-1.21701	-0.200285	0.0275351	-2.81754	-0.894718	-0.205464	0	-0.12717	-1.64342	-2.12425	-0.889084
GSK3a	AMG548	9.35641e-18	1.05881e-20	2.02885e-08	6.17958e-08	0.0809612	0.164916	1.59842e-05	0.000850275	0.000119561	0.0206023	0.114056	0.128381	0.000274815	0.437383	0.428492	0.980888	1	0.0244289	0.00163278	0.307461		GSK3a	AMG548	48.2577	0.445868	108.233	3.58488e-126	-10.8899	-8.60364	3.10398	2.7142	-1.04966	0.838606	2.12872	1.57678	-2.80645	-1.08984	-0.0731148	0.154705	-2.69037	-0.767548	-0.0782943	0.12717	0	-1.51625	-1.99708	-0.761915
	SB203580	6.2136e-14	5.32152e-15	1.49224e-10	3.11182e-10	0.678326	0.000301515	4.81431e-08	7.77024e-07	0.0539626	0.114089	0.0115776	0.00670251	0.175584	0.513411	0.0439375	0.210416	0.0244289	1	0.725881	0.445788			SB203580	49.7739	0.444725	111.921	5.49327e-128	-9.37362	-7.08739	4.62022	4.23045	0.46659	2.35485	3.64496	3.09303	-1.2902	0.426403	1.44313	1.67095	-1.17412	0.748697	1.43795	1.64342	1.51625	0	-0.48083	0.754331
	ERK11e	1.91613e-13	3.26637e-14	2.34858e-12	4.23859e-12	0.216017	1.057e-05	5.6984e-10	1.06394e-08	0.151358	0.068234	0.00186995	0.00101469	0.461602	0.192974	0.00828025	0.0703968	0.00163278	0.725881	1	0.108646			ERK11e	50.2547	0.432685	116.146	5.38598e-130	-8.89279	-6.60656	5.10105	4.71128	0.94742	2.83568	4.12579	3.57386	-0.80937	0.907233	1.92396	2.15178	-0.693291	1.22953	1.91878	2.12425	1.99708	0.48083	0	1.23516
	DMSO	1.19865e-15	1.56601e-17	1.57148e-09	4.19286e-09	0.766086	0.00850733	7.94396e-07	2.33256e-05	0.00410032	0.0989158	0.0750724	0.0531305	0.0138761	0.945176	0.251373	0.606883	0.307461	0.445788	0.108646	1			DMSO	49.0196	0.445153	110.118	4.16141e-127	-10.1279	-7.84172	3.86589	3.47612	-0.287741	1.60052	2.89063	2.33869	-2.04453	-0.327928	0.6888	0.91662	-1.92845	-0.00563353	0.68362	0.889084	0.761915	-0.754331	-1.23516	0
		1	0.0392635	7.60642e-22	5.75135e-22	1.91723e-15	5.25635e-19	5.60638e-21	1.15904e-20	6.53105e-11	2.17647e-14	7.95043e-17	1.34544e-16	3.51342e-11	3.89644e-14	7.93311e-16	4.93156e-12	9.35641e-18	6.2136e-14	1.91613e-13	1.19865e-15				59.1475	0.572781	103.264	1.25281e-123
		0.0392635	1	6.09426e-26	2.66379e-26	2.53403e-17	3.34179e-22	2.40944e-25	6.70843e-25	3.69067e-10	6.26823e-15	1.29523e-18	3.02838e-18	1.00558e-10	4.46899e-15	2.83942e-17	2.65457e-12	1.05881e-20	5.32152e-15	3.26637e-14	1.56601e-17				56.8613	0.452851	125.563	3.17422e-134
		7.60642e-22	6.09426e-26	1	0.637263	6.29656e-11	4.37775e-05	0.0201998	0.00147604	2.54356e-11	8.33209e-09	1.04994e-07	1.98738e-06	1.40666e-11	3.77341e-07	1.93671e-06	0.0049599	2.02885e-08	1.49224e-10	2.34858e-12	1.57148e-09				45.1537	0.53468	84.45	8.85698e-113
		5.75135e-22	2.66379e-26	0.637263	1	1.13818e-10	0.000211581	0.0337931	0.00623393	6.79406e-11	3.27637e-08	5.95075e-07	1.09511e-05	3.2854e-11	1.22277e-06	9.8652e-06	0.0109614	6.17958e-08	3.11182e-10	4.23859e-12	4.19286e-09				45.5434	0.517485	88.0093	5.31627e-115
		1.91723e-15	2.53403e-17	6.29656e-11	1.13818e-10	1	0.000870985	3.294e-08	8.96943e-07	0.00595225	0.0332217	0.00968941	0.00749449	0.0257837	0.664821	0.062103	0.414956	0.0809612	0.678326	0.216017	0.766086				49.3073	0.361788	136.288	1.11977e-138
		5.25635e-19	3.34179e-22	4.37775e-05	0.000211581	0.000870985	1	0.0106916	0.206244	3.34244e-06	0.0018457	0.0432813	0.0962577	4.39356e-06	0.0389781	0.159245	0.662923	0.164916	0.000301515	1.057e-05	0.00850733				47.419	0.340883	139.107	8.63427e-140
		5.60638e-21	2.40944e-25	0.0201998	0.0337931	3.294e-08	0.0106916	1	0.244099	2.57277e-09	7.66828e-07	8.82416e-06	0.000102207	1.81681e-09	6.73649e-05	0.000184072	0.0951551	1.59842e-05	4.81431e-08	5.6984e-10	7.94396e-07				46.1289	0.388591	118.708	3.53243e-131
		1.15904e-20	6.70843e-25	0.00147604	0.00623393	8.96943e-07	0.206244	0.244099	1	2.67934e-08	1.70456e-05	0.000462404	0.00305686	2.08258e-08	0.000838865	0.00459489	0.240456	0.000850275	7.77024e-07	1.06394e-08	2.33256e-05				46.6809	0.360134	129.621	5.9492e-136
		6.53105e-11	3.69067e-10	2.54356e-11	6.79406e-11	0.00595225	3.34244e-06	2.57277e-09	2.67934e-08	1	0.0670942	0.000739189	0.000354054	0.674963	0.0154847	0.00126409	0.00523646	0.000119561	0.0539626	0.151358	0.00410032				51.0641	0.479359	106.526	3.12876e-122
		2.17647e-14	6.26823e-15	8.33209e-09	3.27637e-08	0.0332217	0.0018457	7.66828e-07	1.70456e-05	0.0670942	1	0.216997	0.126238	0.0548128	0.232717	0.183515	0.134662	0.0206023	0.114089	0.068234	0.0989158				49.3475	0.457912	107.766	7.73065e-123
		7.95043e-17	1.29523e-18	1.04994e-07	5.95075e-07	0.00968941	0.0432813	8.82416e-06	0.000462404	0.000739189	0.216997	1	0.914215	0.000817354	0.207371	0.828745	0.407262	0.114056	0.0115776	0.00186995	0.0750724				48.3308	0.485926	99.4611	1.23032e-118
		1.34544e-16	3.02838e-18	1.98738e-06	1.09511e-05	0.00749449	0.0962577	0.000102207	0.00305686	0.000354054	0.126238	0.914215	1	0.000410443	0.145516	0.756144	0.414543	0.128381	0.00670251	0.00101469	0.0531305				48.1029	0.479192	100.383	4.04381e-119
		3.51342e-11	1.00558e-10	1.40666e-11	3.2854e-11	0.0257837	4.39356e-06	1.81681e-09	2.08258e-08	0.674963	0.0548128	0.000817354	0.000410443	1	0.0399737	0.00216461	0.0139586	0.000274815	0.175584	0.461602	0.0138761				50.948	0.600683	84.8168	5.40509e-111
		3.89644e-14	4.46899e-15	3.77341e-07	1.22277e-06	0.664821	0.0389781	6.73649e-05	0.000838865	0.0154847	0.232717	0.207371	0.145516	0.0399737	1	0.439395	0.629757	0.437383	0.513411	0.192974	0.945176				49.0252	0.651383	75.2632	9.91832e-105
		7.93311e-16	2.83942e-17	1.93671e-06	9.8652e-06	0.062103	0.159245	0.000184072	0.00459489	0.00126409	0.183515	0.828745	0.756144	0.00216461	0.439395	1	0.654074	0.428492	0.0439375	0.00828025	0.251373				48.3359	0.580757	83.2293	5.30861e-110
		4.93156e-12	2.65457e-12	0.0049599	0.0109614	0.414956	0.662923	0.0951551	0.240456	0.00523646	0.134662	0.407262	0.414543	0.0139586	0.629757	0.654074	1	0.980888	0.210416	0.0703968	0.606883				48.1305	0.700114	68.7467	5.27917e-100
		9.35641e-18	1.05881e-20	2.02885e-08	6.17958e-08	0.0809612	0.164916	1.59842e-05	0.000850275	0.000119561	0.0206023	0.114056	0.128381	0.000274815	0.437383	0.428492	0.980888	1	0.0244289	0.00163278	0.307461				48.2577	0.445868	108.233	3.58488e-126
		6.2136e-14	5.32152e-15	1.49224e-10	3.11182e-10	0.678326	0.000301515	4.81431e-08	7.77024e-07	0.0539626	0.114089	0.0115776	0.00670251	0.175584	0.513411	0.0439375	0.210416	0.0244289	1	0.725881	0.445788				49.7739	0.444725	111.921	5.49327e-128
		1.91613e-13	3.26637e-14	2.34858e-12	4.23859e-12	0.216017	1.057e-05	5.6984e-10	1.06394e-08	0.151358	0.068234	0.00186995	0.00101469	0.461602	0.192974	0.00828025	0.0703968	0.00163278	0.725881	1	0.108646				50.2547	0.432685	116.146	5.38598e-130
		1.19865e-15	1.56601e-17	1.57148e-09	4.19286e-09	0.766086	0.00850733	7.94396e-07	2.33256e-05	0.00410032	0.0989158	0.0750724	0.0531305	0.0138761	0.945176	0.251373	0.606883	0.307461	0.445788	0.108646	1				49.0196	0.445153	110.118	4.16141e-127

## Sheet: Table_S7_ExpProcDiff
Table S7. Comparison of experimental conditions for compound and temperature treatment as well as cell lysis, centrifugation and recovery of the non-denatured protein fraction.
Study	Present study			Jafari et al., Nature Protocols 2014.			Franken et al., Nature Protocols 2015.
Experiment type	CETSA/TPP-TR	ITDR-CETSA/TPP-CCR		CETSA	ITDRFCETSA		TPP-TR	TPP-CCR
Cell line	HL-60	HL-60		HL-60	HL-60		K562	K562
Compounds	AMG-548, SB203580, ERK 11e	AMG-548, SB203580, ERK 11e		AMG-548, SB203580, ERK 11e	AMG-548, SB203580, ERK 11e		Panobinostat	Panobinostat
	Expand HL-60 cells in cell culture medium to a cell density of 1.25 million cells per ml using standard sterile cell culture procedures and supplies	Expand HL-60 cells in cell culture medium to a cell density of 1.25 million cells per ml using standard sterile cell culture procedures and supplies		Expand HL-60 cells in cell culture medium to a cell density of ∼2 million cells per ml using standard sterile cell culture procedures and supplies	Expand HL-60 cells in cell culture medium to a cell density of ∼2 million cells per ml using standard sterile cell culture procedures and supplies		Expand K562 cells in cell culture medium to a cell density of ~1.4 million cells per ml using standard sterile cell culture procedures and supplies	Expand K562 cells in cell culture medium to a cell density of ~1.4 million cells per ml using standard sterile cell culture procedures and supplies
					Collect the cell suspension with a serological pipette and transfer the cells to 15-ml conical tubes.
					Centrifuge the conical tubes to pellet the cells at 300g for 3 min at room temperature and carefully remove and discard the culture medium. Resuspend the cell pellet in fresh cell culture medium to yield a cell density of ~40 million cells per milliliter.
		Transfer 4 μl of all diluted compound solutions (10, 2.5, 0.625, 0.156, 0.0391, 0.00977, 0.00244, 0.000610, 0.000153 mM and vehicle (DMSO)) to 2 ml Eppendorf tubes labeled with the corresponding designated final concentrations (20, 5, 1.25, 0.313, 0.0781, 0.0195, 0.00488, 0.00122, 0.000305 μM and vehicle (DMSO))			Transfer 5 μl of all diluted compound solutions (50-fold dilution of compound DMSO solutions with cell culture medium; 80, 26.7, 8.89, 2.96, 0.988, 0.329, 0.110, 0.0366, 0.0122, 0.00406, 0.00135 µM and vehicle (DMSO:cell culture medium 1:49)) to a Twin.tec PCR plate (20, 6.67, 2.22, 0.741, 0.247, 0.0823, 0.0274, 0.00914, 0.00305, 0.00102, 0.000339 µM final and vehicle).
	Add 20 ml of the 1.25 million HL-60 cells per milliliter of suspension into four separate T75 flasks. --> 25 million cells	Transfer 10 * 2 ml cells with a density of ~ 1.25 million cells/ml to the 2 ml Eppendorf tubes containing the compound dilutions. --> 2.5 million cells, 0.2% DMSO final		Add 15 ml of the 2 million HL-60 cells per milliliter of suspension into four separate T75 flasks. --> 30 million cells	Add 15 μl of the homogenous cell suspension (40 million cells per milliliter) to each well of the Twin.tec PCR plate. --> 0.6 million cells, 0.5% DMSO final		Add 24ml of the ~1.4million K562cells per milliliter of suspension into four separate T75 flasks. --> 33.6 million cells	Transfer the 10 * 2.5 ml cells with a density of ~ 1.4 million cells/ml to 6-well plates and label the wells with the compound concentration that will be applied (10, 2.5, 0.625, 0.15625, 0.03906, 0.00977, 0.00244, 0.00061, 0.00015 μM and vehicle).
	Add 40 μl each of the 10 mM DMSO stock solutions of AMG-548, SB203580 and ERK 11e to individual flasks to get a final concentration of 20 μM of each compound. Add the same volume of DMSO to the remaining flask serving as the vehicle or solvent control. Gently mix the cell suspension by pipetting up and down several times using a serological pipette. --> 0.2% DMSO final			Add 30 μl each of the 10 mM DMSO stock solutions of AMG-548, SB203580 and ERK 11e to individual flasks to get a final concentration of 20 μM of each compound. Add the same volume of DMSO to the remaining flask serving as the vehicle or solvent control. Gently mix the cell suspension by pipetting up and down several times using a serological pipette. --> 0.2% DMSO final			Add 120 μl each of a 200 μM solution of Panobinostat in DMSO to individual flasks toget a final concentration of 1 μM of each compound. Add the same volume of DMSO to the remaining flask serving as the vehicle control (0.5% final concentration).	Transfer 12.5 μl of all diluted compound solutions to the corresponding labeled well of th 6-well plate containing the 2.5 ml of 1.4million cells per ml. --> 0.5% DMSO final
	Incubate the cell culture flasks for 1 h in the CO2 incubator at 37 °C.	Incubate the Eppendorf tubes for 1 h in the CO2 incubator at 37 °C.		Incubate the cell culture flasks for 1 h in the CO2 incubator at 37 °C.	Incubate the plate for 30 min in the CO2 incubator at 37 °C. Carefully shake the plate manually every 10 min to promote compound access to the cells.		Incubate the cell culture flasks for 5h in the CO2incubator at 37 °C.	Incubate the plate for 5 hrs in the CO2incubator at 37 °C.
	Collect the cell suspension with a serological pipette andtransfer the cells to marked 50-ml conical tubes.			Collect the cell suspension with a serological pipette and transfer the cells to marked 15-ml conical tubes.	Comment: --no washing: cell lysis in cell culture medium containing BSA and other additives		Collect the cell suspension with a serological pipette andtransfer the cells to marked 50-ml conical tubes.	Transfer 10x 2.5ml cell suspension into to 10correspondingly labeled15mlconicaltubes.
	Centrifuge the conical tubes at 300g for 3 min at room temperature (r.t.) to pellet the cells, and then carefully remove and discard all of the culture medium	Centrifuge the 2 ml Eppendorf tubes at 300g for 3 min at room temperature to pellet the cells, and then carefully remove and discard all of the culture medium		Centrifuge the conical tubes at 300g for 3 min at room temperature to pellet the cells, and then carefully remove and discard all of the culture medium.			Centrifuge the conical tubes at 300g for 3 min at room temperature to pellet the cells, and then carefully remove and discard all of the culture medium	Centrifugethe conical tubes at 300g for 3min at room temperature to pellet the cells, and then carefully remove and discard all of the culture medium.
	Gently resuspend the cell pellets with 20 ml of PBS (r.t.) and centrifuge them at 300g for 3 min at room temperature to pellet the cells again. Carefully remove and discard all of the supernatant.	Gently resuspend the cell pellets with 2 ml of PBS (r.t.) and centrifuge them at 300g for 3 min at room temperature to pellet the cells again. Carefully remove and discard all of the supernatant.		Gently resuspend the cell pellets with 15 ml of PBS and centrifuge them at 300g for 3 min at room temperature to pellet the cells again. Carefully remove and discard all of the supernatant (repeat this step if necessary).			Gently resuspend the cell pellets with 20ml of ice cold PBS and centrifuge them at 300g for 3 min at room temperature to pellet the cells again. Carefully remove and discard all of the supernatant. Repeat this step.	Gently resuspend the cell pellets with 10ml of PBS and centrifuge them at 300g for 3 min at room temperature to pellet the cells again. Carefully remove and discard all of the supernatant. Repeat this step.
	Gently resuspend the cell pellets with 500 µl PBS (r.t.), transfer the cell suspension to pre-weighted and labeled 2 ml Eppendorf tubes and centrifuge at 300g for 3 min at room temperature to pellet the cells again. Carefully remove and discard all of the supernatant. Determine the cell pellet wet weight.	Gently resuspend the cell pellets with 500 µl PBS (r.t.) and centrifuge them at 300g for 3 min at room temperature to pellet the cells again. Carefully remove and discard all of the supernatant.
	Add 1 ml of ice-cold PBS supplemented with protease inhibitors to each respective tube and carefully resuspend the cell pellet. From now on, keep the samples on ice unless noted otherwise.	Add 100 µl of ice-cold PBS supplemented with protease inhibitors to each respective tube and carefully resuspend the cell pellet. From now on, keep the samples on ice unless noted otherwise.		Add 1 ml of PBS supplemented with protease inhibitors to each respective tube and carefully resuspend the cell pellet.			Add 1.2ml of ice-cold PBS supplemented with protease inhibitors to each respective tube and carefully resuspend the cell pellet.	Add 125 μl of ice-cold PBS supplemented with protease inhibitors to each respective tube and carefully resuspend the cell pellet.
	Distribute each cell suspension, i.e., with vehicle (DMSO) control or with the test compound, into ten different 0.2-ml PCR tubes with 100 μl of cell suspension in each tube (∼2.5 million cells per tube). Mark each tube or strip with a designated temperature (36.5, 41.2, 44.0, 47.1, 49.8, 53.3, 56.0, 59.2, 64.0, 67.0°C). This yields a total of 40 PCR tubes divided into ten strips with four tubes …	Transfer the 100 μl of each cell suspension into 0.2-ml PCR tubes (~2.5 million cells per tube). Mark each tube with the corresponding compound concentration.		Distribute each cell suspension, i.e., with DMSO control or with the test compound, into ten different 0.2-ml PCR tubes with 100 μl of cell suspension in each tube (∼3 million cells per tube). Mark each tube or strip with a designated temperature (40–67 °C). This yields a total of 40 PCR tubes divided into ten strips with four tubes per strip (this setup facilitates the tube handling during heat …			Distribute each cell suspension, i.e., with vehicle control or with the test compound, into ten different 0.2-ml PCR tubes with 100 μl of cell suspension in each tube (~3 million cells per tube). Mark each tube or strip with a designated temperature (37–67 °C). This yields a total of 40 PCR tubes.	Distribute 100 μl of each cell suspension into ten different 0.2-ml PCR tubes (~3 million cells per tube). Mark each tube with a designated concentration.
							Centrifuge the PCR tubes at 300g for 3 min at 4°C to pellet the cells, and then carefully remove 80 μl of PBS.Gently tapp the tubes to resuspend the cells. The tubes are kept at 4°C before the heat treatment step.	Centrifuge the PCR tubes at 300g for 3 min at 4°C to pellet the cells, and then carefully remove 80 μl of PBS. Gently tapp the tubes to resuspend the cells. The tubes are kept at 4°C before the heat treatment step.
	Incubate PCR-tube strips at room temperature for 7 min, then heat the PCR-tube strips at their designated temperature for 3 min in the PCR cycler (DNA Engine Tetrad 2, Lid temperature 70°C, Gradient Block 1: 36-55°C, Gradient Block 2: 48-67°C).	Incubate PCR-tube strips at room temperature for 7 min, then heat the PCR-tube strips at 51°C for 3 min in the PCR cycler (DNA Engine Tetrad 2, Lid temperature 70°C, Block Temperature: 51°C).		Heat the PCR-tube strips at their designated temperature for 3 min in the Veriti 96-well thermal cycler.	heat the cells for 3 min at 50 °C.		Heat the PCR-tubes at their designated temperature for 3 min in the PTC-200 Peltier Thermal Cycler.	Place the PCR tubes into the cycler and heat the cells for 3 min at 55°C.
	Immediately after heating, remove and incubate the tubes at room temperature for 3 min. After this 3-min incubation, immediately snap-freeze the samples in liquid nitrogen.	Immediately after heating, remove the tubes from the instrument and place them in an aluminum block at room temperature for 3 min to ensure consistent cooling between the tubes. After this 3-min incubation, immediately snap-freeze the samples in liquid nitrogen.		Immediately after heating, remove and incubate the tubes at room temperature for 3 min. After this 3-min incubation, immediately snap-freeze the samples in liquid nitrogen.	Remove the plate from the instrument and place it in an aluminum block at room temperature for 3 min to ensure consistent cooling between wells.		Immediately after heating, remove and incubate the tubes at room temperature for 3 min. After this 3-min incubation, immediately snap-freeze the samples in liquid nitrogen.	Remove the tubes from the instrument and place it in an aluminum block at room temperature for 3 min to ensureconsistent cooling between wells.
					Transfer 50 μl (REMARK: There are only 20 µl) of the samples in individual wells of the Twin.tec PCR plate into individual 0.2-ml PCR tubes, preferably in strips. This yields a total of 36 PCR tubes or 12 tubes per compound (keeping the tubes in strips facilitates tube handling). Snap-freeze the heat-treated cell suspensions in liquid nitrogen.
	Freeze-thaw the cells four times using liquid nitrogen and a thermal cycler or heating block set at 25 °C to ensure a uniform temperature between tubes. The tubes are mixed by inversion after each thawing. The resulting cell lysates are kept on ice (4 °C) after the last thawing step.	Freeze-thaw the cells four times using liquid nitrogen and a thermal cycler or heating block set at 25 °C to ensure a uniform temperature between tubes. The tubes are mixed by inversion after each thawing. The resulting cell lysates are kept on ice (4 °C) after the last thawing step.		Freeze-thaw the cells twice using liquid nitrogen and a thermal cycler or heating block set at 25 °C in order to ensure a uniform temperature between tubes. The tubes are vortexed briefly after each thawing. The resulting cell lysates are kept on (4 °C) ice after the last thawing step.	Freeze-thaw the cells twice using liquid nitrogen and a thermal cycler or heating block set at 25 °C to ensure a uniform temperature between tubes. The tubes are vortexed briefly after each thawing. The resulting cell lysates are kept on ice (4 °C) after the last thawing step.		Freeze-thaw the cells twice using liquid nitrogen and a thermal cycler or heating block set at 25 °C in order to ensure a uniform temperature between tubes. The tubes are vortexed briefly after each thawing. The resulting cell lysates are kept on (4 °C) ice after the last thawing step.	Freeze-thaw the cells twice using liquid nitrogen and a thermal cycler or heating block set at 25 °C in order to ensure a uniform temperature between tubes. The tubes are vortexed briefly after each thawing. The resulting cell lysates are kept on (4 °C) ice after the last thawing step.
	Mix the lysates by inversion and centrifuge the cell lysate–containing tubes at 20,000g for 20 min at 4 °C to pellet cell debris together with precipitated and aggregated proteins. Carefully remove the tubes from the centrifuge and avoid disturbing the pellets. Keep the samples on ice in a cooling block.	Mix the lysates by inversion and centrifuge the cell lysate–containing tubes at 20,000g for 20 min at 4 °C to pellet cell debris together with precipitated and aggregated proteins. Carefully remove the tubes from the centrifuge and avoid disturbing the pellets. Keep the samples on ice in a cooling block.		Briefly vortex the tubes and centrifuge the cell lysate–containing tubes at 20,000g for 20 min at 4 °C to pellet cell debris together with precipitated and aggregated proteins. Carefully remove the tubes from the centrifuge and avoid disturbing the pellets. Keep the samples on ice in a cooling block.	Briefly vortex the tubes and centrifuge the cell lysate containing tubes at 20,000g for 20 min at 4 °C to pellet cell debris together with precipitated and aggregated proteins. Carefully remove the tubes from the centrifuge so as not to disturb the pellet. Keep the samples on ice in a cooling block.		Briefly vortex the tubes, transfer the cell lysates to 0.2 ml polycarbonate thickwall tubes and centrifuge the cell lysate–containing tubes at 100,000g for 20 min at 4 °C to pellet cell debris together with precipitated and aggregated proteins. Carefully remove the tubes from the centrifuge and avoid disturbing the pellets. Keep the samples on ice in a cooling block	Briefly vortex the tubes, transfer the cell lysates to 0.2 ml polycarbonate thickwall tubes and centrifuge the cell lysate–containing tubes at 100,000g for 20 min at 4 °C to pellet cell debris together with precipitated and aggregated proteins. Carefully remove the tubes from the centrifuge and avoid disturbing the pellets. Keep the samples on ice in a cooling block.
	Carefully transfer 90 μl of each supernatant with the soluble protein fraction to a new tube. The soluble fraction (cell extract) is now ready for analysis with the detection method of your choice.	Carefully transfer 90 μl of each supernatant with the soluble protein fraction to a new tube. The soluble fraction (cell extract) is now ready for analysis with the detection method of your choice.		Carefully transfer 90 μl of each supernatant with the soluble protein fraction to a new tube. The soluble fraction is now ready for analysis with the detection method of your choice.	For each tube, transfer 40 μl (REMARK: There are only 20 µl) of each supernatant containing the soluble protein fraction to a new tube. The soluble fraction is now ready for analysis by western blotting.		Take out ultracentrifuge tubes with the help of tweezers and place them into a precooled cooling rack. Carefully take off 30 µl (REMARK: There are only 20 µl) of the supernatant containing the soluble protein fraction and transfer it to 1.5-ml Eppendorf tubes and keep them on ice.	Take out ultracentrifuge tubes with the help of tweezers and place them into a precooled cooling rack. Carefully take off 30 µl (REMARK: there are only 20 µl) of the supernatant containing the soluble protein fraction and transfer it to 1.5-ml Eppendorf tubes and keep them on ice.

## Sheet: Table_1_Tm
						Living cells							Cell extracta						ΔTm to DMSO in cell extract compared to living cells / °C								Living cells, TR, MS TMT	Living cells, TR, MS TMT	Living cells, TR, MS TMT	Living cells, TR, MS TMT	Living cells, TR, MS TMT	Living cells, TR, LF MS	Living cells, TR, LF MS	Living cells, TR, LF MS	Living cells, TR, LF MS	Living cells, TR, LF MS	Living cells, TR, WB	Living cells, TR, WB	Living cells, TR, WB	Living cells, TR, WB	Living cells, TR, WB	Cell extract, TR, WB	Cell extract, TR, WB	Cell extract, TR, WB	Cell extract, TR, WB	Cell extract, TR, WB
				Protein	Inhibitor	n	Tm / °C		Std. Error	ΔTm to DMSO / °C	p-value (ANOVA, to DMSO)		Tm / °C		Std. Error	ΔTm to DMSO / °C	p-value (ANOVA, to DMSO)											Protein		Inhibitor	Parameter		Protein		Inhibitor	Parameter		Protein		Inhibitor	Parameter		Protein		Inhibitor	Parameter
				MAPK14	AMG-548	7	60.5813		0.517183	14.7616	4.1∙10-46	***	59.1475		0.572781	13.6041	5.8∙10-22	***	-1.15757								2	MAPKAPK3	1	AMG548	Tm	2	MAPKAPK3	1	AMG548	Tm	2	MAPKAPK3	1	AMG548	Tm	2	MAPKAPK3	1	AMG548	Tm
					SB203580	4	52.8586		0.350009	7.0389	4.3∙10-25	***	56.8613		0.452851	11.3178	2.7∙10-26	***	4.27894								2	MAPKAPK3	2	SB203580	Tm	2	MAPKAPK3	2	SB203580	Tm	2	MAPKAPK3	2	SB203580	Tm	2	MAPKAPK3	2	SB203580	Tm
					ERK 11e	4	45.562		0.427995	-0.257724	0.170013		45.1537		0.53468	-0.389774	0.637263		-0.13205								2	MAPKAPK3	3	ERK11e	Tm	2	MAPKAPK3	3	ERK11e	Tm	2	MAPKAPK3	3	ERK11e	Tm	2	MAPKAPK3	3	ERK11e	Tm
					DMSO	4	45.8197		0.359087				45.5434		0.517485												2	MAPKAPK3	4	DMSO	Tm	2	MAPKAPK3	4	DMSO	Tm	2	MAPKAPK3	4	DMSO	Tm	2	MAPKAPK3	4	DMSO	Tm
				MAPKAPK3	AMG-548	6	54.6788		0.360372	6.61588	3.7∙10-15	***	49.3073		0.361788	2.62644	9.0∙10-7	***	-3.98944								3	MAPKAPK2	1	AMG548	Tm	3	MAPKAPK2	1	AMG548	Tm	3	MAPKAPK2	1	AMG548	Tm	3	MAPKAPK2	1	AMG548	Tm
					SB203580	3	51.5617		0.481661	3.49879	2.2∙10-7	***	47.419		0.340883	0.738174	0.206244		-2.76061								3	MAPKAPK2	2	SB203580	Tm	3	MAPKAPK2	2	SB203580	Tm	3	MAPKAPK2	2	SB203580	Tm	3	MAPKAPK2	2	SB203580	Tm
					ERK 11e	3	48.3234		0.460277	0.260426	0.573314		46.1289		0.388591	-0.551937	0.244099		-0.812363								3	MAPKAPK2	3	ERK11e	Tm	3	MAPKAPK2	3	ERK11e	Tm	3	MAPKAPK2	3	ERK11e	Tm	3	MAPKAPK2	3	ERK11e	Tm
					DMSO	3	48.0629		0.402416				46.6809		0.360134												3	MAPKAPK2	4	DMSO	Tm	3	MAPKAPK2	4	DMSO	Tm	3	MAPKAPK2	4	DMSO	Tm	3	MAPKAPK2	4	DMSO	Tm
				MAPKAPK2	AMG-548	6	54.3875		0.285706	5.18264	5.2∙10-7	***	51.0641		0.479359	2.96115	3.5∙10-4	***	-2.22149																							4	MAPKAPK2p	1	AMG548	Tm
					SB203580	3	50.9584		0.557889	1.75349	0.179122		49.3475		0.457912	1.24455	0.126238		-0.508946																							4	MAPKAPK2p	2	SB203580	Tm
					ERK 11e	3	49.1856		1.02764	-0.0193049	0.99341		48.3308		0.485926	0.22782	0.914215		0.247125																		4	MAPKAPK2p	3	ERK11e	Tm	4	MAPKAPK2p	3	ERK11e	Tm
					DMSO	3	49.2049		1.40279				48.1029		0.479192																						4	MAPKAPK2p	4	DMSO	Tm	4	MAPKAPK2p	4	DMSO	Tm
				MAPKAPK2p	AMG-548		n.d.b						50.948		0.600683	2.81754	0.014	*									5	GSK3a	1	AMG548	Tm	5	GSK3a	1	AMG548	Tm	5	GSK3a	1	AMG548	Tm	5	GSK3a	1	AMG548	Tm
					SB203580		n.d.b						49.0252		0.651383	0.894718	0.629757										5	GSK3a	2	SB203580	Tm	5	GSK3a	2	SB203580	Tm	5	GSK3a	2	SB203580	Tm	5	GSK3a	2	SB203580	Tm
					ERK11e	1	47.1794		0.900181	-1.06667	0.131304		48.3359		0.580757	0.205464	0.654074		1.15651								5	GSK3a	3	ERK11e	Tm	5	GSK3a	3	ERK11e	Tm	5	GSK3a	3	ERK11e	Tm	5	GSK3a	3	ERK11e	Tm
					DMSO	1	48.2461		0.494403				48.1305		0.700114				-0.115629								5	GSK3a	4	DMSO	Tm	5	GSK3a	4	DMSO	Tm	5	GSK3a	4	DMSO	Tm	5	GSK3a	4	DMSO	Tm
			Tm	GSK-3α	AMG-548	7	53.2597		0.245686	-0.713777	0.237891		48.2577		0.445868	-0.761915	0.307461		-0.0481379								1	MAPK14	1	AMG548	Tm	1	MAPK14	1	AMG548	Tm	1	MAPK14	1	AMG548	Tm	1	MAPK14	1	AMG548	Tm
					SB203580	4	54.0263		0.328177	0.0528557	0.816014		49.7739		0.444725	0.754331	0.445788		0.701475								1	MAPK14	2	SB203580	Tm	1	MAPK14	2	SB203580	Tm	1	MAPK14	2	SB203580	Tm	1	MAPK14	2	SB203580	Tm
					ERK 11e	4	54.1086		0.304504	0.135176	0.943546		50.2547		0.432685	1.23516	0.108646		1.09999								1	MAPK14	3	ERK11e	Tm	1	MAPK14	3	ERK11e	Tm	1	MAPK14	3	ERK11e	Tm	1	MAPK14	3	ERK11e	Tm
					DMSO	4	53.9735		0.30538				49.0196		0.445153												1	MAPK14	4	DMSO	Tm	1	MAPK14	4	DMSO	Tm	1	MAPK14	4	DMSO	Tm	1	MAPK14	4	DMSO	Tm
				an=3 for incubation temperatures 36.5, 41.2, 44.0, 59.2, 64.0, and 67.0°C; n=4 for incubation temperatures 47.1, 49.8, 53.3, and 56.0°C bNot determined because MAPKAPK2p was not detected upon treatment of living cells with AMG-548 or SB203580
									Top / %						Top / %
				MAPKAPK2	SB203580			a	86.9789
				MAPKAPK2	ERK11e			b	36.1295
				MAPKAPK2	DMSO			c	27.3585
				MAPKAPK2p	ERK11e			d	19.9048
				MAPKAPK2p	DMSO			e	22.5367
				MAPKAPK2p	ALL									f	25.2333
																																	GSK3a		AMG548	Bottom_alt
																																	GSK3a		DMSO	Bottom_alt
																																	GSK3a		ERK11e	Bottom_alt
																																	GSK3a		SB203580	Bottom_alt
													99.9983		3.31023																							GSK3a		AMG548	Top		GSK3a		X-biolRepl1	Top
													99.9984		2.68208																							GSK3a		DMSO	Top		GSK3a		X-biolRepl1	Top
						100			2.35088				99.999		3.37387																							GSK3a		ERK11e	Top		MAPK14		X-biolRepl1	Top
						100			2.12794				99.9986		2.4236																							GSK3a		SB203580	Top		MAPK14		X-biolRepl1	Top
						100			2.12794				100		4.30668																							MAPK14		AMG548	Top		MAPKAPK2		X-biolRepl1	Top
						100			2.12794				100		3.30344																							MAPK14		DMSO	Top		MAPKAPK2		X-biolRepl1	Top
						99.9997			3.15867				25.2333		0.895407																							MAPK14		ERK11e	Top		MAPKAPK2p		ALL	Top
						99.9996			2.63039				99.9723		2.87362																							MAPK14		SB203580	Top		MAPKAPK3		X-biolRepl1	Top
						99.9998			2.63039				99.9665		2.38268													GSK3a		AMG548	Top							MAPKAPK2		AMG548	Top		MAPKAPK3		X-biolRepl1	Top
						99.9997			2.63039																			GSK3a		DMSO	Top							MAPKAPK2		DMSO	Top
						99.9951			2.62068																			GSK3a		ERK11e	Top							MAPKAPK2		ERK11e	Top
						27.3585			4.69927																			GSK3a		SB203580	Top							MAPKAPK2		SB203580	Top
						36.1295			4.66633																			MAPK1		AMG548	Top		GSK3a		AMG548	Slope_alt		MAPKAPK2p		DMSO	Top
						86.9789			4.4225																			MAPK1		DMSO	Top		GSK3a		DMSO	Slope_alt		MAPKAPK2p		ERK11e	Top
						22.5367			1.18348																			MAPK1		ERK11e	Top		GSK3a		ERK11e	Slope_alt		MAPKAPK3		AMG548	Top
						19.9048			1.62146																			MAPK1		SB203580	Top		GSK3a		SB203580	Slope_alt		MAPKAPK3		DMSO	Top
						100			3.03209																			MAPK14		AMG548	Top		GSK3a		AMG548	Tm_alt		MAPKAPK3		ERK11e	Top
						100			3.03209																			MAPK14		DMSO	Top		GSK3a		DMSO	Tm_alt		MAPKAPK3		SB203580	Top
						100			3.03209																			MAPK14		ERK11e	Top		GSK3a		ERK11e	Tm_alt
						100			NA																			MAPK14		SB203580	Top		GSK3a		SB203580	Tm_alt
																												MAPK3		AMG548	Top		GSK3a		AMG548	Top_alt
																												MAPK3		DMSO	Top		GSK3a		DMSO	Top_alt
																												MAPK3		ERK11e	Top		GSK3a		ERK11e	Top_alt
																												MAPKAPK2		AMG548	Top		GSK3a		SB203580	Top_alt
																												MAPKAPK2		DMSO	Top
																												MAPKAPK2		ERK11e	Top
																												MAPKAPK2		SB203580	Top
																												MAPKAPK3		AMG548	Top
																												MAPKAPK3		DMSO	Top
																												MAPKAPK3		ERK11e	Top
																												MAPKAPK3		SB203580	Top
																												STAT6		AMG548	Top
																												STAT6		DMSO	Top
																												STAT6		ERK11e	Top
																												STAT6		SB203580	Top

## Sheet: Table_3_and_S3_EC50-TPP-CCR
	TPP-CCR, Living cells
	Inhibitor	Protein	Representative protein ID	pEC50	Std. Error	Hill slope	Std. Error	pseudo R2	na
	AMG-548	MAPK14	Q16539	8.33417	0.0373221	0.567499	0.0270349	0.981074	5
		MAPKAPK3	Q16644	8.59887	0.0510645	0.679483	0.0531202	0.958098	5
		MAPKAPK2	P49137	8.60355	0.0523529	0.718646	0.0602722	0.953775	5
		MYLK	Q15746	8.22487	0.152014	0.438001	0.0686913	0.772268	5
		USP24	Q9UPU5	8.56725	0.128195	0.71263	0.144524	0.749815	5
		STX4	Q12846	6.88366	0.298154	0.265923	0.0602693	0.71382	2
		HN1L	Q9H910	6.41398	0.173506	0.394455	0.0635145	0.691005	5
		MARS	P56192	6.68401	0.219519	0.403835	0.0823216	0.636645	4
		NUDT1	P36639	5.63962	0.134708	0.765702	0.173014	0.621864	5
		MAPK8	P45983	7.90621	0.461822	0.242873	0.081115	0.578751	2
		TRAPPC4	Q9Y296	6.3947	0.210812	0.427538	0.0883152	0.574743	5
		MRPS34	P82930	7.22298	0.443433	0.257347	0.0859122	0.550568	2
		MTMR1	Q13613	6.97874	0.389427	0.383687	0.133512	0.545007	2
	SB203580	MAPKAPK2	P49137	6.15213	0.0619253	0.768403	0.0759494	0.942248	4
		MAPKAPK3	Q16644	6.04885	0.0616362	0.764373	0.0753719	0.941919	4
		MAPK14	Q16539	5.71214	0.0583239	0.813125	0.0826687	0.933809	4
		NAPG	Q99747	8.70572	0.436943	0.236823	0.0675617	0.727885	2
		WDR46	A0A0G2JJL1	7.48569	0.41893	0.23499	0.071852	0.606158	2
		MAPK8	P45983	6.49615	0.332755	0.440439	0.145544	0.584669	2
		MYLK	Q15746	6.0197	0.301376	0.499243	0.170878	0.580794	2
		C14orf166	Q9Y224	6.39288	0.285291	0.327577	0.0778303	0.522044	4
	aOf the five or four replicates analyzed for AMG-548 or SB203580 treated living HL-60 cells, respectively, "n" datasets were obtained exhibiting a full set of reporter ion intensities, which were then used for fitting of dose response curves.
	Inhibitor	Protein	Representative protein ID	pEC50	Std. Error	Hill slope	Std. Error	pseudo R2	na
	ERK 11e	UGGT1	Q9NYU2	5.27131	0.0435749	1.97191	0.453392	0.892207	4
		SCO1	O75880	5.54878	0.110201	1.2503	0.349088	0.850319	2
		GANAB	Q14697	5.2773	0.0597679	1.80809	0.482444	0.828889	4
		MAPK3	P27361	6.36659	0.182083	0.590379	0.134787	0.821199	2
		UNC119B	A6NIH7	5.976	0.160416	0.672872	0.15608	0.817961	2
		PDIA6	Q15084	5.45359	0.0871506	1.32898	0.317271	0.792402	4
		SMIM12	E5RH51	6.36615	0.229372	0.467564	0.112164	0.746873	2
		MIA3	Q5JRA6	5.47364	0.104878	0.981928	0.216804	0.72236	4
		FECH	P22830	6.20047	0.188592	0.378776	0.06543	0.708002	4
		OGDH	Q02218	6.38446	0.181136	0.427075	0.0758005	0.705336	4
		POR	P16435	5.89145	0.18286	0.726503	0.206546	0.646383	3
		PDCD4	Q53EL6	5.98287	0.196004	0.68954	0.199272	0.585668	4
		PFAS	O15067	5.9333	0.25579	0.303829	0.0620378	0.58093	4
		UBE2O	Q9C0C9	6.72888	0.257935	0.373136	0.0851345	0.570996	4
		LRRC59	Q96AG4	5.83183	0.198292	0.587926	0.154014	0.557484	4
		CANX	P27824	6.06329	0.192921	0.796794	0.254806	0.554051	4
		RARS	P54136	7.07607	0.269568	0.382473	0.091893	0.54409	4
		HN1L	Q9H910	6.96377	0.341249	0.202246	0.0489412	0.536293	4
		DDX18	Q9NVP1	6.70096	0.48785	0.200964	0.0686992	0.530788	2
		ENDOG	Q14249	8.55848	0.445594	0.403843	0.178451	0.525732	2
		CHMP4B	Q9H444	7.37505	0.358913	0.205024	0.052136	0.515734	4
		NOP2	P46087	6.98047	0.263939	0.290535	0.0601435	0.50966	4
		VAPA	Q9P0L0	5.80515	0.192268	0.663065	0.186015	0.50905	4
		ANP32E	H0YCE2	6.7753	0.358491	0.576082	0.248605	0.503525	2
	aOf the four replicates analyzed for ERK 11e treated living HL-60 cells, "n" datasets were obtained exhibiting a full set of reporter ion intensities, which were then used for fitting of dose response curves.
